# Supplementary material
Source: PubMed Central journal article supplement (PMC7243422)
Supplement: DS_10.1177_0022034520905792.pdf [file DS_10.1177_0022034520905792.pdf]

# Insights Obtained by Culturing Saccharibacteria With Their Bacterial Hosts

B. Bor, A.J. Collins, P.P. Murugkar, S. Balasubramanian, T.T. To, E.L. Hendrickson, J.K. Bedree, F.B. Bidlack, C.D. Johnston, W. Shi, J.S. McLean, X. He and F.E. Dewhirst

## APPENDIX

### Additional Materials and Methods

#### ***Phase contrast imaging.***

All bacteria were cultured to early stationary phase under standard growth conditions. Cells were harvested, washed and resuspended in fresh medium to OD 600 of ~2.5. One  $\mu\text{L}$  of cell resuspension was spotted on a glass slide and covered with a cover slip. Cells were viewed using Nikon Eclipse E400 microscope equipped with a Nikon Plan Fluor  $\times 100/1.30$  oil immersion objective (Bor et al. 2016).

#### ***Fluorescence In Situ Hybridization (FISH) imaging.***

FISH was carried out as previously described (Bor et al. 2016) with modifications. Briefly, the early stationary phase cells were fixed using 4% formaldehyde for 3 hours and permeabilized using 2 mg/mL lysozyme in 20 mM Tris pH 7.0 for 9 min at 37°C. Fixed cells were resuspended in 500  $\mu\text{L}$  of hybridization buffer (20 mM Tris•Cl, pH 8.0, 0.9 M NaCl, 0.01% SDS, 30% deionized formamide) and incubated at 37°C for 30 minutes. A TM7-specific (TM7-567: Cy5-5'-CCTACGCAACTCTTTACGCC-3') probe was hybridized with the cells for 3 hours at 42°C. Cells were then washed three times for 15 minutes each with 0.1x saline-sodium citrate buffer. During the second wash, the universal DNA stain SYTO®9 (Invitrogen) was added to the wash in 1:1000 dilution. Cells were mounted on the cover slip with SlowFade Gold antifade reagent (Invitrogen) and visualized with a Leica SPE I inverted confocal microscope equipped with an ACS APO 100x/1.15 oil CS immersion objective.

#### ***Scanning Electron Microscopy (SEM) imaging.***

Round coverslips (12 mm) coated with poly-L-Lysine were placed in 24 well plates containing 1 mL TSBY broth in each well and 100  $\mu\text{L}$  of 24-hour old host monocultures or binary cultures of hosts with their associated Saccharibacteria strains added. The coverslip was removed after 24 hours, fixed overnight in a solution of 4% glutaraldehyde, 3% paraformaldehyde, and 0.05% ruthenium red in 0.1 M Cacodylate buffer. The cover slips were then washed three times for 10 min each with 0.1M Cacodylate buffer and postfixed with 1% osmium tetroxide and 0.05% ruthenium red in 0.1M Cacodylate buffer for 1 hour. The coverslip was then washed twice for 10 minutes with distilled water and dehydrated for 10 minutes per step in an ethanol series (50%, 70%, 80%), ending with 95% ethanol, three times for 10 minutes each. The coverslip was critical point dried to maintain the shape of the cells, coated with 5 nm platinum-palladium and imaging data collected in a field emission SEM (Zeiss Ultra 55 FE-SEM) at 2kV at a working distance between 3 and 5mm using either secondary electron or in lens-detector.

#### ***PCR detection of Saccharibacteria.***

A master mix was created using primers specific for Saccharibacteria (Brinig et al. 2003; Hugenholtz et al. 2001) and 1  $\mu\text{L}$  of infected culture was used as template. Thermocycling conditions were: 95°C for 5 min, followed by 30 cycles of 95°C for 30s, 60°C for 30s and 72°C for 30s, followed by a final elongation step of 72°C for 2 min and an infinite hold at 4°C. Products were analyzed on a 1% agarose gel. Hosts were determined to be stably infected if they were PCR positive for Saccharibacteria through the end of the 5<sup>th</sup> passage in broth culture. Once the presence of the Saccharibacteria was confirmed, 100  $\mu\text{L}$  of broth culture was serially diluted and plated onto agar medium to obtain single infected colonies. Multiple colonies were picked and cultivated in corresponding broth medium and the presence of Saccharibacteria in the coculture (containing host and single Saccharibacteria strain) was confirmed via full length 16S RNA sequencing. Once confirmed, frozen stocks of the binary culture containing the Saccharibacteria and its host were made and kept at -80°C for later use.

#### ***Genome assembly and annotation.***

Illumina sequences were assembled using SPAdes (version 3.9.0) (Nurk et al. 2013). The BBDuk (Bushnell 2015) tool for Geneious (v 9.1.8) was used to quality trim and filter Illumina adapters, artifacts, and phiX from

reads. Paired reads with quality scores averaging less than 6 before trimming or with a length under 20 bp after trimming were discarded. PacBio sequencing reads were processed using Pacific Biosciences' SMRTlink pipeline version-6 with the HGAP assembly tool standard protocol. Single contigs generated through HGAP were also processed through Circlator version 1.5.5 using default settings to assign the start site of each sequence to dnaA. Hybrid assemblies were created using HybridSPAdes as part of the SPAdes package (version 3.9.0) and closed with manual curation using the assembled scaffolds. Gene predictions and annotations were determined using Prokka (prokka 1.12-beta). In order to investigate shared and unique genome functions, annotations were derived from Prokka (Seemann 2014), GhostKOALA (Kanehisa et al. 2016), and Roary (Page et al. 2015). GhostKOALA determined KEGG identifier numbers for the protein sequences. The comparative genomic analysis was performed using Roary, which clusters proteins using MCL-edge (20% amino acid identity cutoff) (Heberle et al. 2015). Graphical representations of the shared proteins were produced with Interactivenn ([www.interactivenn.net](http://www.interactivenn.net)). Whole genome alignments were generated using Mauve (Darling et al. 2004).

### **Acquiring growth curves and subsequent analysis.**

Monoculture of bacterial host and coculture of bacterial host with its *Saccharibacteria* parasite were recovered from frozen stocks and passaged twice in culture medium to ensure homogeneity. Three to five replicate samples (250  $\mu$ L) of each culture were loaded into 96-well plates with starting optical density (OD600) of 0.05. The analogous image-based cell density measurement (TANormalized) was acquired using OcelloScope (BioSense Solutions) every 60 minutes for the indicated amount of time (Bor et al. 2018). The growth curve is graphed by plotting time versus arbitrary unit (a.u.) of the OcelloScope measurement which is equivalent to cell density measurement at 600 nm.

Generation times were calculated from cell densities from a 2-hour window of exponential growth in each curve with an a.u. minimum of 0.1. Cell densities were used in the equation  $\log N_t - \log N_0 / 0.301 * t$  to derive the exponential growth rate, where  $N_t$  is the final cell density,  $N_0$  is the initial cell density and  $t$  is time in hours. Generation times are the reciprocal of the exponential growth rate.

### **Testing *Saccharibacteria* species host ranges.**

Binary cocultures of *Saccharibacteria* strains and their hosts were grown in TSBY (AC001 and PM004) or BHI (TM7x and BB001). The resultant growth was vortexed vigorously for one minute to detach loosely attached *Saccharibacteria* cells from their host and break up aggregates. Within the cocultures, there are also planktonic *Saccharibacteria* cells not attached to host. Twenty mL of the vortexed culture was passed through a 0.2-micron track-etched polycarbonate filter (Millipore) to collect just the *Saccharibacteria* cells. Filters were washed with 10 mL of buffer (Maximal Recovery Diluent, MRD). The flow-through and the wash fractions were collected in a 26 mL ultracentrifuge bottles and spun at 60,000 x g for 1 hour in Ti-70 rotor using a Beckman-Coulter Optima L-100 XP ultracentrifuge. The nearly invisible pellets were resuspended in 2 mL of buffer to create a concentrated suspension of *Saccharibacteria* cells independent of their host.

To infect new hosts, 2 mL of fresh media (BHI for *Actinomyces spp.*, TSOY/BHI/RPMI for all others tested) was inoculated with 200  $\mu$ L of an overnight culture of a candidate host organism. To this, 200  $\mu$ L of *Saccharibacteria* cell suspension prepared as described above was added. Cultures were incubated microaerophilically (2% O<sub>2</sub>, 5% CO<sub>2</sub>, 93% N<sub>2</sub>) in a Coy Hypoxic Chamber at 37°C for 48 hours. Cultures were then passaged into 2 mL of fresh media with added 200  $\mu$ L of an overnight culture of candidate host cells with their *Saccharibacteria*. Infections were screened by PCR (as described above) for the first 5 passages to determine if infections were stable.

## APPENDIX FIGURES

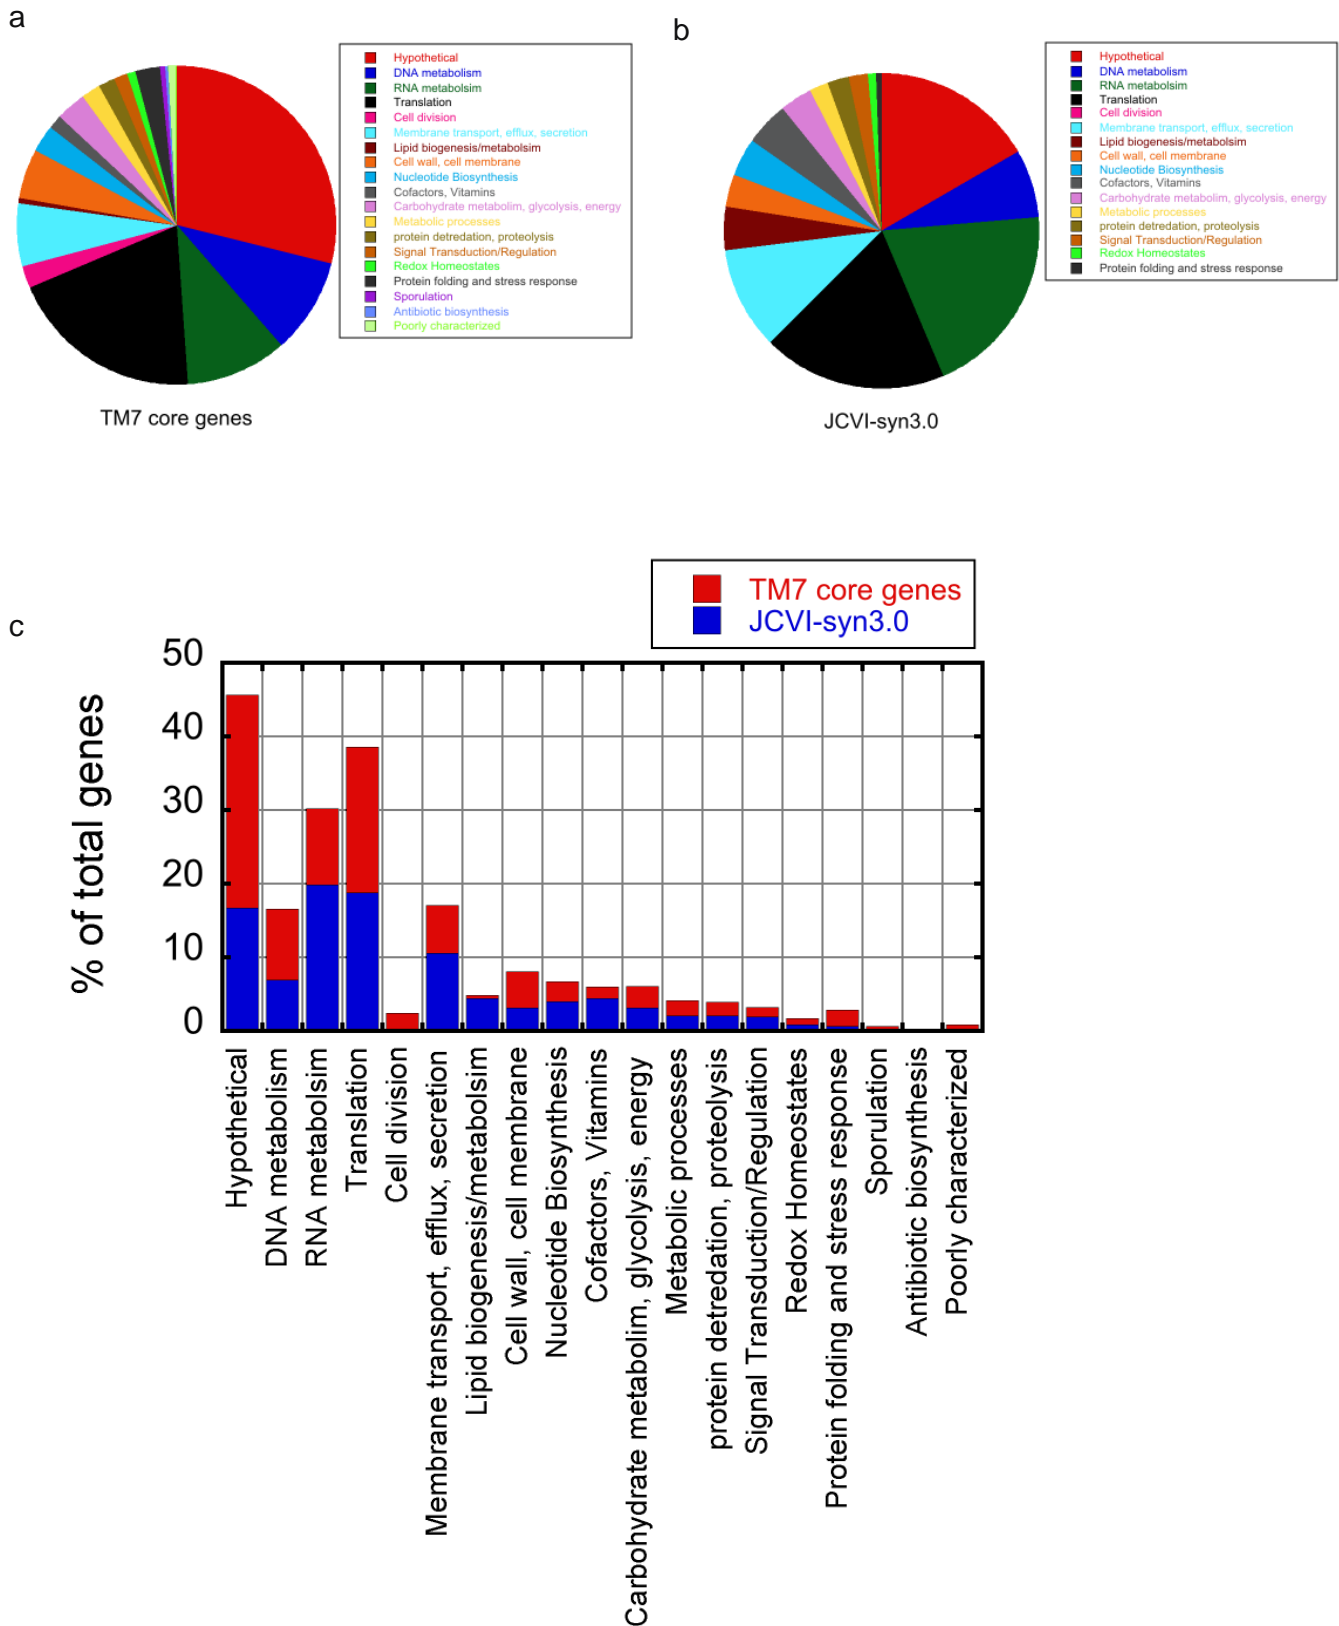

**Appendix Figure 1.** Core gene function. (a) 446 core genes from four oral Saccharibacteria genomes were functionally categorized into different groups. A majority of the genes were either hypothetical, DNA metabolism, RNA metabolism or translation genes. (b) Streamlined core gene categories for the JCVI-syn3.0 strain that has the minimal core genes needed to survive on its own (Hutchison et al. 2016). (c) Comparing the percent of certain functional groups between core genes of four Saccharibacteria strains and JCVI-syn3.0. Both had very similar functional gene category except Saccharibacteria had few additional genes.

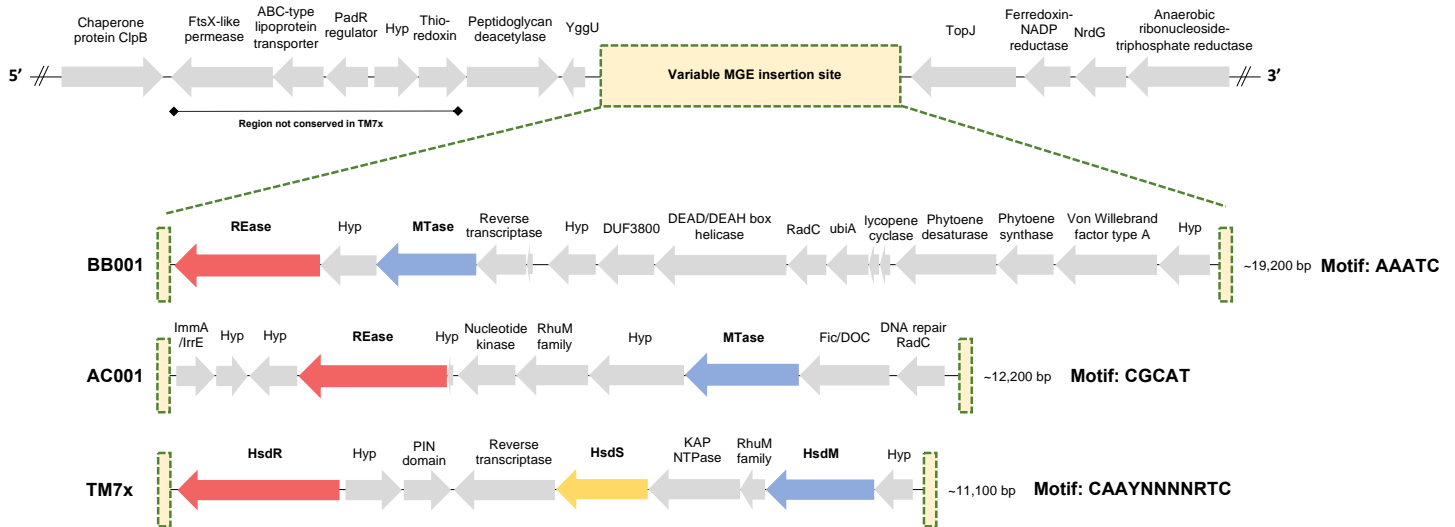

**Appendix Figure 2.** Diagram of conserved insertion site for mobile genetic elements in TM7 strains. In each strain, a mobile genetic element harboring an RM system has inserted within a conserved genomic locus flanked by a 5' prime 1.7 kbp region containing a Peptidoglycan-N-acetylmuramic acid deacetylase gene and a 3' prime 5.2 kbp region containing genes associated with ferredoxin reductase and an anaerobic ribonucleoside-triphosphate reductase. Putative restriction endonuclease and methyltransferase genes are shown in red and blue, respectively, and specificity hsdS subunits are shown in yellow. Proteins not identified as part of the RM system or those with currently unknown function are shown in grey.

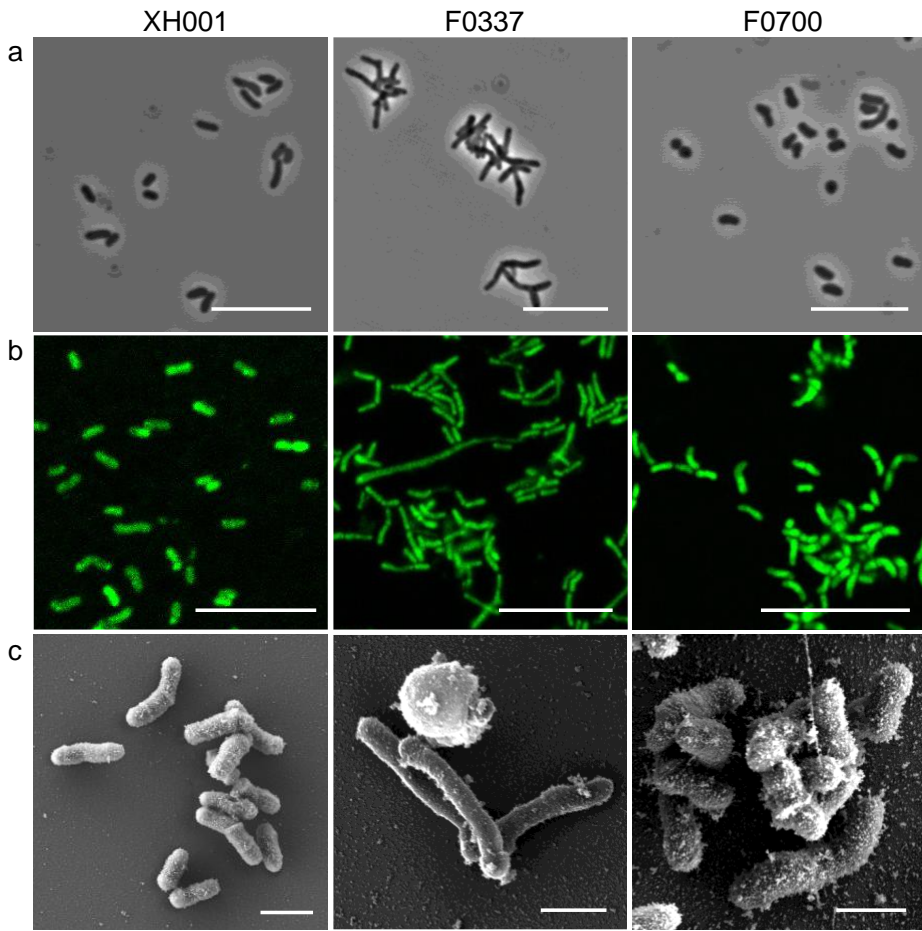

**Appendix Figure 3.** Imaging analysis of the host monocultures. Host monocultures were grown in appropriate media for 24 hours and imaged using (a) phase contrast, (b) FISH and (c) SEM. The coculture images with the Saccharibacteria are shown in main Figure 4. Scale bars are 10  $\mu\text{m}$  for Phase contrast and FISH images while 1  $\mu\text{m}$  for the SEM.

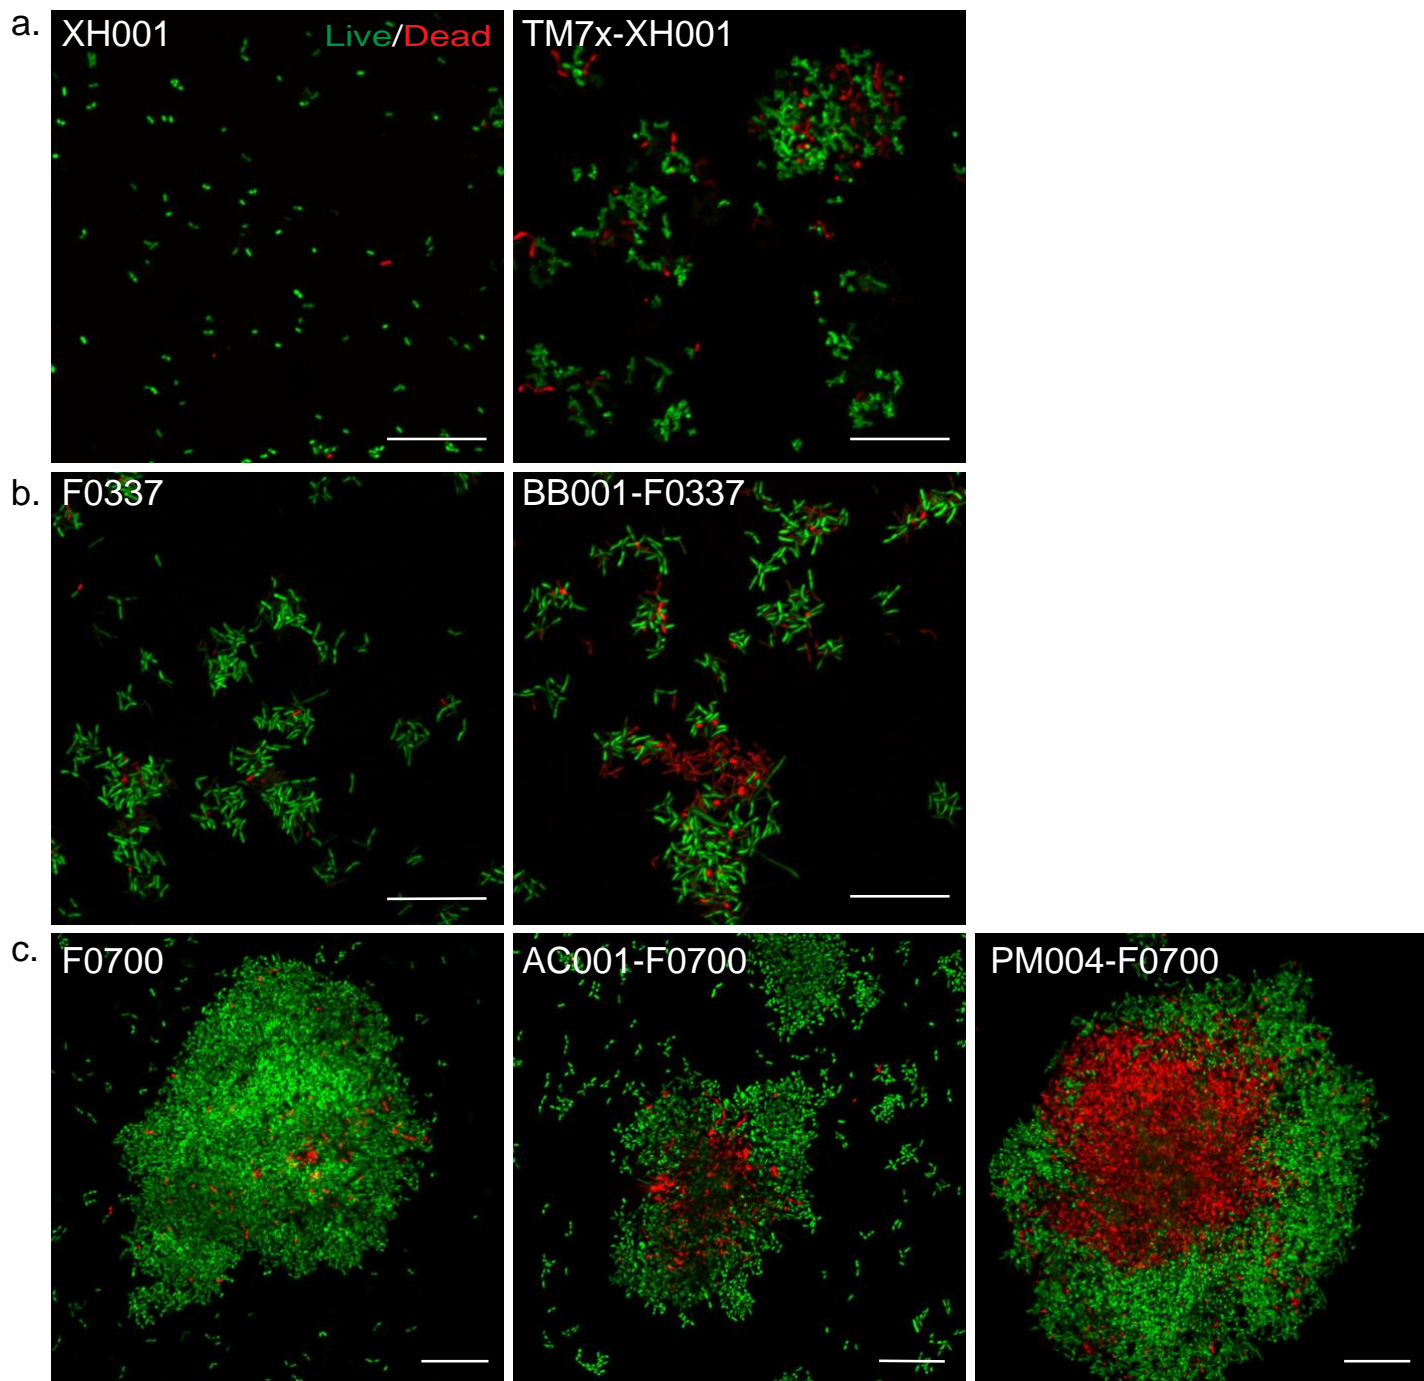

**Appendix Figure 4.** Live-Dead staining of mono and cocultures. Live (green) and Dead (red) staining of (a) TM7x-XH001, (b) BB001-F0337 and (c) AC001-F0700 and PM004-F0700 were carried out by following the manufacturer's guidelines (Invitrogen Cat#L34960). Stained cells were visualized on the Zeiss LSM 780 confocal microscope using 63x oil immersion objective. All cells grew for 24 hours and were imaged at the stationary phase. All scale bars are 20  $\mu$ m.



## APPENDIX TABLES

**Table 1.** “Baiting” host summary list.

| Phylum         | Species                                    | HMT     | Strain     | Isolation results Bor | Isolation results Collins | Isolation results Murugkar |
|----------------|--------------------------------------------|---------|------------|-----------------------|---------------------------|----------------------------|
| Actinobacteria | <i>Actinomyces bovis</i>                   | nonoral | ATCC 13683 | negative              |                           |                            |
| Actinobacteria | <i>Actinomyces georgiae</i>                | 617     | F0490      | negative              |                           |                            |
| Actinobacteria | <i>Actinomyces graevenitzi</i>             | 866     | F0530      | negative              |                           |                            |
| Actinobacteria | <i>Actinomyces johnsonii</i>               | 849     | F0330      | negative              |                           |                            |
| Actinobacteria | <i>Actinomyces massiliensis</i>            | 852     | F0489      | negative              |                           |                            |
| Actinobacteria | <i>Actinomyces meyeri</i>                  | 671     | W712       | negative              |                           |                            |
| Actinobacteria | <i>Actinomyces naeslundii</i>              | 176     | ATCC 12104 | negative              |                           |                            |
| Actinobacteria | <i>Actinomyces odontolyticus</i>           | 701     | XH001      | negative              |                           |                            |
| Actinobacteria | <i>Actinomyces</i> sp. HMT-170             | 170     | F0386      | negative              |                           |                            |
| Actinobacteria | <i>Actinomyces</i> sp. HMT-171             | 171     | F0337      | BB001                 |                           | negative                   |
| Actinobacteria | <i>Actinomyces</i> sp. HMT-169             | 169     | F0496      |                       | negative                  |                            |
| Actinobacteria | <i>Actinomyces</i> sp. HMT-448             | 448     | F0400      | negative              |                           |                            |
| Actinobacteria | <i>Actinomyces</i> sp. HMT-897             | 897     | F0715      |                       | negative                  |                            |
| Actinobacteria | <i>Actinomyces</i> sp. HMT-180             | 180     | ICM58      | negative              |                           |                            |
| Actinobacteria | <i>Corynebacterium matruchotii</i>         | 666     | ATCC 33806 |                       | negative                  |                            |
| Actinobacteria | <i>Pseudopropionibacterium propionicum</i> | 739     | F0230      |                       | AC001                     | PM004                      |
| Firmicutes     | <i>Lachnoanaerobaculum saburreum</i>       | 494     | F0468      |                       | negative                  |                            |
| Fusobacteria   | <i>Leptotrichia wadei</i>                  | 222     | F0279      |                       |                           | negative                   |

**Table 2.** Percent Identity of cultivated Saccharibacteria strains by 16S rRNA molecular phylogeny.

|       | TM7x | BB001 | AC001 | PM004 |
|-------|------|-------|-------|-------|
| TM7x  | 100  | 99.4  | 98.6  | 94    |
| BB001 | 99.4 | 100   | 98.2  | 94.6  |
| AC001 | 98.6 | 98.2  | 100   | 93.9  |
| PM004 | 94   | 94.6  | 93.9  | 100   |

**Table 3.** Saccharibacteria genome summary.

|               | Genome (bp) | gene numbers | Number of RNAs | Contigs | GC content |
|---------------|-------------|--------------|----------------|---------|------------|
| <b>TM7x</b>   | 705,138     | 707          | 44             | 1       | 44.5       |
| <b>BB001</b>  | 779,575     | 776          | 45             | 1       | 47.9       |
| <b>AC001</b>  | 890,309     | 908          | 46             | 1       | 50.6       |
| <b>PM004</b>  | 842,372     | 834          | 46             | 1       | 46.8       |
| <b>S. aal</b> | 1,013       | 1040         | 49             | 1       | 49.1       |
| <b>GWC2</b>   | 1,039       | 1083         | 50             | 1       | 47.6       |
| <b>RAAC3</b>  | 845         | 887          | 49             | 1       | 49.4       |

**Table 4.** Core genes shared among full/complete genomes of TM7x, BB001, AC001 and PM004 were compared resulting in 446 core genes (129/446 hypothetical).

|                                                                 |                                                                                                |                                                               |
|-----------------------------------------------------------------|------------------------------------------------------------------------------------------------|---------------------------------------------------------------|
| Chromosomal replication initiator protein DnaA_dnaA_            | Enolase 2_eno2_                                                                                | hypothetical protein_group_866                                |
| 1-deoxy-D-xylulose-5-phosphate synthase_dxs_                    | Exodeoxyribonuclease 7 large subunit_xseA_                                                     | hypothetical protein_group_867_                               |
| 1,4-alpha-glucan branching enzyme GlgB_glgB_                    | Exodeoxyribonuclease I_sbcB_                                                                   | hypothetical protein_group_873_                               |
| 2,3-bisphosphoglycerate-dependent phosphoglycerate mutase_gpmA_ | Exodeoxyribonuclease_exoA_                                                                     | hypothetical protein_group_903_                               |
| 23S rRNA (uracil-C(5))-methyltransferase RlmCD_rlmCD_           | Ferric uptake regulation protein_fur_                                                          | hypothetical protein_group_908                                |
| 30S ribosomal protein S1_rpsA_                                  | FK506-binding protein_fbp_                                                                     | hypothetical protein_group_912                                |
| 30S ribosomal protein S10_rpsJ_                                 | Flavoheмоprotein_hmp_                                                                          | hypothetical protein_group_99_                                |
| 30S ribosomal protein S11_rpsK_                                 | Formamidopyrimidine-DNA glycosylase_mutM_                                                      | hypothetical protein_ioIC_                                    |
| 30S ribosomal protein S12_rpsL_                                 | GDP-6-deoxy-D-mannose reductase_InpD_                                                          | hypothetical protein_pgsA_                                    |
| 30S ribosomal protein S13_rpsM_                                 | GDP-mannose-dependent alpha-(1-6)-phosphatidylinositol monomannoside mannosyltransferase_pimB_ | hypothetical protein_piIE_                                    |
| 30S ribosomal protein S15_rpsO_                                 | Gluconeogenesis factor_group_476_                                                              | hypothetical protein_surA_                                    |
| 30S ribosomal protein S16_rpsP_                                 | Glutamate--tRNA ligase 1_gltX1_                                                                | hypothetical protein_tqsA_                                    |
| 30S ribosomal protein S17_rpsQ_                                 | Glutamyl-tRNA(Gln) amidotransferase subunit A_gatA_                                            | hypothetical protein_xseB_                                    |
| 30S ribosomal protein S18_rpsR_                                 | Glyceraldehyde-3-phosphate dehydrogenase_gap_                                                  | hypothetical protein_ydeN_1_                                  |
| 30S ribosomal protein S19_rpsS_                                 | Glycine--tRNA ligase_glyQS_                                                                    | Inorganic pyrophosphatase_ppa_                                |
| 30S ribosomal protein S2_rpsB_                                  | Glycogen synthase_group_134_                                                                   | Isoprenyl transferase_uppS_                                   |
| 30S ribosomal protein S20_rpsT_                                 | GTP pyrophosphokinase_relA_                                                                    | Leucine--tRNA ligase_leuS_                                    |
| 30S ribosomal protein S21_rpsU_                                 | GTP-binding protein TypA/BipA_typA_                                                            | LexA repressor_lexA_                                          |
| 30S ribosomal protein S3_rpsC_                                  | GTPase Der_der_                                                                                | Lipopolysaccharide assembly protein B_lapB_                   |
| 30S ribosomal protein S4_rpsD_                                  | GTPase Obg_obg_                                                                                | Lipoprotein-releasing system ATP-binding protein LolD_lolD_1_ |
| 30S ribosomal protein S5_rpsE_                                  | Guanylate kinase_gmk_                                                                          | Magnesium and cobalt efflux protein CorC_corC_                |
| 30S ribosomal protein S6_rpsF_                                  | Heat-inducible transcription repressor HrcA_hrcA_                                              | Membrane protein insertase YidC_2_yidC2_                      |
| 30S ribosomal protein S7_rpsG_                                  | Hemolysin A_tlyA_                                                                              | Mercuric reductase_merA_                                      |
| 30S ribosomal protein S8_rpsH_                                  | Histidine--tRNA ligase_hisS_                                                                   | Metalloprotease MmpA_mmpA_                                    |
| 30S ribosomal protein S9_rpsI_                                  | Holliday junction ATP-dependent DNA helicase RuvA_ruvA_                                        | Methionine aminopeptidase 1_map_                              |
| 50S ribosomal protein L1_rplA_                                  | Holliday junction ATP-dependent DNA helicase RuvB_ruvB_                                        | Methionine--tRNA ligase_metG_                                 |
| 50S ribosomal protein L10_rplJ_                                 | hypothetical protein_aroK_                                                                     | Methionyl-tRNA formyltransferase_fmt_                         |
| 50S ribosomal protein L11_rplK_                                 | hypothetical protein_bcrC_                                                                     | N utilization substance protein B_nusB_                       |
| 50S ribosomal protein L13_rplM_                                 | hypothetical protein_cyaB_                                                                     | N-acetylmuramoyl-L-alanine amidase sle1_sle1_                 |
| 50S ribosomal protein L14_rplN_                                 | hypothetical protein_ftsA_1_                                                                   | NAD-dependent malic enzyme_group_822_                         |
| 50S ribosomal protein L15_rplO_                                 | hypothetical protein_ftsQ_                                                                     | Nucleoid-associated protein_group_672_                        |
| 50S ribosomal protein L16_rplP_                                 | hypothetical protein_group_103_                                                                | Nucleoside diphosphate kinase_ndk_                            |
| 50S ribosomal protein L17_rplQ_                                 | hypothetical protein_group_192_                                                                | Oligo-1,6-glucosidase_mail_                                   |
| 50S ribosomal protein L18_rplR_                                 | hypothetical protein_group_202_                                                                | Oligopeptide-binding protein AppA_appA_                       |
| 50S ribosomal protein L19_rplS_                                 | hypothetical protein_group_203_                                                                | Oligoribonuclease_orn_                                        |
| 50S ribosomal protein L2_rplB_                                  | hypothetical protein_group_211_                                                                | Orotate phosphoribosyltransferase_pyrE_                       |
| 50S ribosomal protein L20_rplT_                                 | hypothetical protein_group_270_                                                                | Penicillin-binding protein 1F_pbpF_                           |
| 50S ribosomal protein L21_rplU_                                 | hypothetical protein_group_271_                                                                | Peptide chain release factor 1_prfA_                          |
| 50S ribosomal protein L22_rplV_                                 | hypothetical protein_group_285_                                                                | Peptide chain release factor 2_prfB_                          |
| 50S ribosomal protein L23_rplW_                                 | hypothetical protein_group_331_                                                                | Peptide deformylase_def_                                      |
| 50S ribosomal protein L24_rplX_                                 | hypothetical protein_group_338_                                                                | Peptidyl-tRNA hydrolase_pth_                                  |
| 50S ribosomal protein L27_rpmA_                                 | hypothetical protein_group_367_                                                                | Phenylalanine--tRNA ligase alpha subunit_pheS_                |
| 50S ribosomal protein L28_rpmB_                                 | hypothetical protein_group_369_                                                                | Phenylalanine--tRNA ligase beta subunit_pheT_                 |
| 50S ribosomal protein L29_rpmC_                                 | hypothetical protein_group_371_                                                                | Phospho-N-acetylmuramoyl-pentapeptide-transferase_mraY_       |
| 50S ribosomal protein L3_rplC_                                  | hypothetical protein_group_38_                                                                 | Polyribonucleotide nucleotidyltransferase_pnp_                |
| 50S ribosomal protein L31 type B_rpmE2_                         | hypothetical protein_group_393_                                                                | Primosomal protein N'__priA_                                  |
| 50S ribosomal protein L33_rpmG_                                 | hypothetical protein_group_401_                                                                | Proline--tRNA ligase_proS_                                    |
| 50S ribosomal protein L35_rpmI_                                 | hypothetical protein_group_409_                                                                | Protein GrpE_grpE_                                            |
| 50S ribosomal protein L4_rplD_                                  | hypothetical protein_group_426_                                                                | Protein RecA_reca_                                            |
| 50S ribosomal protein L5_rplE_                                  | hypothetical protein_group_429_                                                                | Protein translocase subunit SecA_secA_                        |
| 50S ribosomal protein L6_rplF_                                  | hypothetical protein_group_435_                                                                | Protein translocase subunit SecE_secE_                        |



|                                                                                                  |                                 |                                                                              |
|--------------------------------------------------------------------------------------------------|---------------------------------|------------------------------------------------------------------------------|
| 50S ribosomal protein L7/L12_rplL_                                                               | hypothetical protein_group_445_ | Protein translocase subunit SecY_secY_                                       |
| 6-phospho-5-dehydro-2-deoxy-D-gluconate aldolase_iolJ_                                           | hypothetical protein_group_446_ | putative ABC transporter ATP-binding protein YknY_yknY_                      |
| 7-carboxy-7-deazaguanine synthase_queE_                                                          | hypothetical protein_group_452_ | putative ABC transporter permease YknZ_yknZ_                                 |
| 8-demethyl-8-(2,3-dimethoxy-alpha-L-rhamnosyl)-tetracenomyacin-C 4'-O-methyltransferase_elmMIII_ | hypothetical protein_group_453_ | Putative ATP-dependent DNA helicase YjcD_yjcD_                               |
| ABC transporter permease YtrF_ytrF_                                                              | hypothetical protein_group_454_ | putative chromosome-partitioning protein ParB_parB_                          |
| Adenylate kinase_adk_                                                                            | hypothetical protein_group_461_ | putative CtpA-like serine protease_ctpB_                                     |
| ADP-dependent (S)-NAD(P)H-hydrate dehydratase_nnrD_                                              | hypothetical protein_group_484_ | putative lipid II flippase MurJ_murJ_                                        |
| Alanine--tRNA ligase_alaS_                                                                       | hypothetical protein_group_490_ | Putative lipoprotein YerB_yerB_                                              |
| Alkaline phosphatase synthesis transcriptional regulatory PhoP                                   | hypothetical protein_group_491_ | putative membrane protein_group_537_                                         |
| Alpha-monoglucosyldiacylglycerol synthase_mgs_                                                   | hypothetical protein_group_494_ | putative MscS family protein YkuT_ykuT_                                      |
| Alternate 30S ribosomal protein S14_rpsN2_                                                       | hypothetical protein_group_497_ | Putative multidrug export ATP-binding/permease protein                       |
| Aminopeptidase N_pepN_                                                                           | hypothetical protein_group_499_ | Putative multidrug export ATP-binding/permease protein_loID_                 |
| Anaerobic ribonucleoside-triphosphate reductase_nrdD_                                            | hypothetical protein_group_500_ | putative peptidoglycan glycosyltransferase FtsW_ftsW_                        |
| Aquaporin Z_apqZ_                                                                                | hypothetical protein_group_504_ | putative PIN and TRAM-domain containing protein YacL_yacL_                   |
| Arginine transport system permease protein ArtQ_artQ_                                            | hypothetical protein_group_514_ | Putative pre-16S rRNA nuclease_yrrK_                                         |
| Arginine--tRNA ligase_argS_                                                                      | hypothetical protein_group_522_ | Putative serine protease HtrA_htrA_                                          |
| Arginine-binding extracellular protein ArtP_artP_                                                | hypothetical protein_group_524_ | Putative threonylcarbamoyl-AMP synthase_ywIC_                                |
| Aspartyl/glutamyl-tRNA(Asn/Gln) amidotransferase subunit B_gatB_                                 | hypothetical protein_group_526_ | Putative transcriptional regulator YvhJ_yvhJ_                                |
| Aspartyl/glutamyl-tRNA(Asn/Gln) amidotransferase subunit C_gatC_                                 | hypothetical protein_group_530_ | putative transcriptional regulatory protein/MSMEI_2866_pmpR_                 |
| ATP synthase epsilon chain_atpC_                                                                 | hypothetical protein_group_532_ | putative tRNA-dihydrouridine synthase_dus_                                   |
| ATP synthase gamma chain_atpG_                                                                   | hypothetical protein_group_534_ | Putative two-component membrane permease complex subunit SMU_747c_group_958_ |
| ATP synthase subunit a_atpB_                                                                     | hypothetical protein_group_539_ | Putative zinc metalloprotease Rip2_rip2_                                     |
| ATP synthase subunit alpha_atpA_                                                                 | hypothetical protein_group_541_ | Pyruvate kinase_pyk_                                                         |
| ATP synthase subunit b_atpF_                                                                     | hypothetical protein_group_543_ | Recombination protein RecR_recR_                                             |
| ATP synthase subunit beta_atpD_2_                                                                | hypothetical protein_group_544_ | Regulatory protein RecX_recX_                                                |
| ATP synthase subunit c_atpE_                                                                     | hypothetical protein_group_545_ | Release factor glutamine methyltransferase_prmC_                             |
| ATP synthase subunit delta_atpD_1_                                                               | hypothetical protein_group_550_ | Replication-associated recombination protein A_rarA_                         |
| ATP-dependent Clp protease ATP-binding subunit ClpC_clpC_                                        | hypothetical protein_group_551_ | Replicative DNA helicase_dnaC_                                               |
| ATP-dependent Clp protease ATP-binding subunit ClpE_clpE_                                        | hypothetical protein_group_554_ | Ribonuclease 3_rnc_                                                          |
| ATP-dependent Clp protease proteolytic subunit_clpP_                                             | hypothetical protein_group_568_ | Ribonuclease HI_rnhA_                                                        |
| ATP-dependent DNA helicase PcrA_pcrA_                                                            | hypothetical protein_group_569_ | Ribonuclease HII_rnhB_                                                       |
| ATP-dependent DNA helicase RecG_recG_                                                            | hypothetical protein_group_570_ | Ribonuclease J1_rnjA_                                                        |
| ATP-dependent RecD-like DNA helicase_recD2_                                                      | hypothetical protein_group_571_ | Ribonuclease P protein component_rnpA_                                       |
| ATP-dependent zinc metalloprotease FtsH_ftsH_                                                    | hypothetical protein_group_581_ | Ribonuclease Y_rny_                                                          |
| Bifunctional oligoribonuclease and PAP phosphatase NrnA_nrnA_                                    | hypothetical protein_group_583_ | Ribonucleoside-diphosphate reductase 1 subunit alpha_nrdA_                   |
| Bifunctional PGK/TIM_pgk/tpi_                                                                    | hypothetical protein_group_584_ | Ribonucleoside-diphosphate reductase subunit beta_nrdB_                      |
| Bifunctional protein FOLD protein_foID_                                                          | hypothetical protein_group_587_ | Ribose-5-phosphate isomerase B_rpiB_                                         |
| Carbamate kinase 1_arcC1_                                                                        | hypothetical protein_group_596_ | Ribosomal large subunit pseudouridine synthase B_rluB_                       |
| Cell division ATP-binding protein FtsE_ftsE_                                                     | hypothetical protein_group_597_ | Ribosomal large subunit pseudouridine synthase D_rluD_                       |
| Cell division protein FtsA_ftsA_2_                                                               | hypothetical protein_group_598_ | Ribosomal RNA large subunit methyltransferase H_rlmH_                        |
| Cell division protein FtsA_ftsA_3_                                                               | hypothetical protein_group_600_ | Ribosomal RNA small subunit methyltransferase A_rsmA_                        |
| Cell division protein FtsA_group_272_ftsA_1                                                      | hypothetical protein_group_601_ | Ribosomal RNA small subunit methyltransferase D_rsmD_                        |
| Cell division protein FtsL_ftsL_                                                                 | hypothetical protein_group_602_ | Ribosomal RNA small subunit methyltransferase H_rsmH_                        |
| Cell division protein FtsX_ftsX_                                                                 | hypothetical protein_group_603_ | Ribosome hibernation promotion factor_hpf_                                   |
| Cell division protein FtsZ_ftsZ_                                                                 | hypothetical protein_group_605_ | Ribosome-binding ATPase YchF_ychF_                                           |
| Chaperone protein DnaJ_dnaJ_                                                                     | hypothetical protein_group_607_ | Ribosome-recycling factor_frr_                                               |
| Chaperone protein DnaK_dnaK_                                                                     | hypothetical protein_group_608_ | Ribulose-phosphate 3-epimerase_rpe_                                          |
| Cobyric acid synthase_cobQ_                                                                      | hypothetical protein_group_612_ | RNA polymerase principal sigma factor HrdA_hrdA_                             |
| ComE operon protein 3_comEC_                                                                     | hypothetical protein_group_618_ | RNA polymerase sigma factor SigA_sigA_                                       |
| Competence protein ComM_comM_                                                                    | hypothetical protein_group_621_ | RNA pyrophosphohydrolase_rppH_4_                                             |

|                                                                          |                                                                                                                           |                                                                      |
|--------------------------------------------------------------------------|---------------------------------------------------------------------------------------------------------------------------|----------------------------------------------------------------------|
| Crossover junction endodeoxyribonuclease RuvC_ruvC_                      | hypothetical protein_group_622_                                                                                           | Sensor histidine kinase ResE_walk_2_                                 |
| Cysteine desulfurase IscS_iscS_                                          | hypothetical protein_group_626_                                                                                           | Sensor histidine kinase Walk_walk_1_                                 |
| Cysteine--tRNA ligase_cysS_                                              | hypothetical protein_group_630_                                                                                           | Sensor histidine kinase Walk_walk_3_                                 |
| D-aminoacyl-tRNA deacylase_tatD_                                         | hypothetical protein_group_631_                                                                                           | Sensor protein KdpD_kdpD_                                            |
| dCTP deaminase_dcd_                                                      | hypothetical protein_group_636_                                                                                           | Sensor protein kinase Walk_group_83_walk_1_                          |
| Dephospho-CoA kinase_coaE_                                               | hypothetical protein_group_643_                                                                                           | Serine hydroxymethyltransferase_glyA_                                |
| Diadenosine hexaphosphate hydrolase_ndx1_                                | hypothetical protein_group_647_                                                                                           | Serine--tRNA ligase_serS_                                            |
| Dihydrofolate reductase_dfrA_                                            | hypothetical protein_group_649_                                                                                           | Signal peptidase I T_sipT_                                           |
| Dihydroorotate dehydrogenase (quinone)_pyrD_                             | hypothetical protein_group_664_                                                                                           | Single-stranded DNA-binding protein_ssb_                             |
| Disulfide bond formation protein D_bdbD_                                 | hypothetical protein_group_679_                                                                                           | Single-stranded-DNA-specific exonuclease RecJ_recJ_                  |
| DNA base-flipping protein_atl_                                           | hypothetical protein_group_688_                                                                                           | Spore protein SP21_hspA_                                             |
| DNA gyrase subunit A_gyrA_                                               | hypothetical protein_group_702_                                                                                           | Sporulation initiation inhibitor protein Soj_soj_                    |
| DNA gyrase subunit B_gyrB_                                               | hypothetical protein_group_711_                                                                                           | SsrA-binding protein_smpB_                                           |
| DNA ligase_ligA_                                                         | hypothetical protein_group_713_                                                                                           | Stage V sporulation protein D_spoVD_                                 |
| DNA polymerase I, thermostable_poiA_                                     | hypothetical protein_group_714_                                                                                           | Teichoic acid translocation permease protein TagG_tagG_              |
| DNA polymerase III subunit alpha_dnaE_                                   | hypothetical protein_group_716_                                                                                           | Teichoic acids export ATP-binding protein TagH_tagH_                 |
| DNA polymerase III subunit beta_dnaN_                                    | hypothetical protein_group_717_                                                                                           | Thioredoxin reductase_trxB_                                          |
| DNA polymerase III subunit gamma/tau_dnaX_2_                             | hypothetical protein_group_723_                                                                                           | Threonine--tRNA ligase_thrS_                                         |
| DNA polymerase III subunit tau_dnaX_1_                                   | hypothetical protein_group_729_                                                                                           | Thymidylate kinase_tmk_                                              |
| DNA primase_dnaG_                                                        | hypothetical protein_group_730_                                                                                           | Thymidylate synthase_thyA_                                           |
| DNA processing protein DprA_dprA_                                        | hypothetical protein_group_732_                                                                                           | Transcription elongation factor GreA_greA_1_                         |
| DNA repair protein RadA_radA_                                            | hypothetical protein_group_734_                                                                                           | Transcription termination/antitermination protein NusA_nusA_         |
| DNA repair protein RecO_recO_                                            | hypothetical protein_group_741_                                                                                           | Transcription termination/antitermination protein NusG_nusG_         |
| DNA replication and repair protein RecF_recF_                            | hypothetical protein_group_743_                                                                                           | Transcriptional regulatory protein OmpR_ompR_                        |
| DNA topoisomerase 1_topA_                                                | hypothetical protein_group_752_                                                                                           | Transcriptional regulatory protein SrrA_srrA_                        |
| DNA translocase SpoIIIE_spoIIIE_                                         | hypothetical protein_group_753_                                                                                           | Transcriptional repressor NrdR_nrdR_2_                               |
| DNA-binding response regulator MtrA_mtrA_                                | hypothetical protein_group_754_                                                                                           | Transketolase 2_tktB_                                                |
| DNA-directed RNA polymerase subunit alpha_rpoA_                          | hypothetical protein_group_762_                                                                                           | Translation initiation factor IF-1_infA_                             |
| DNA-directed RNA polymerase subunit beta_rpoB_                           | hypothetical protein_group_768_                                                                                           | Translation initiation factor IF-2_infB_                             |
| DNA-directed RNA polymerase subunit beta' rpoC_                          | hypothetical protein_group_769_                                                                                           | Translation initiation factor IF-3_infC_                             |
| Elongation factor G_fusA_                                                | hypothetical protein_group_771_                                                                                           | Trigger factor_tig_                                                  |
| Elongation factor P_efp_                                                 | hypothetical protein_group_775_                                                                                           | Triosephosphate isomerase_tpiA_                                      |
| Elongation factor Ts_tsf_                                                | hypothetical protein_group_780_                                                                                           | tRNA (guanine-N(1)-)-methyltransferase_trmD_                         |
| Elongation factor Tu_tuf_                                                | hypothetical protein_group_786_                                                                                           | tRNA (guanine-N(7)-)-methyltransferase_trmB_                         |
| Endolytic murein transglycosylase_mltG_                                  | hypothetical protein_group_796_                                                                                           | tRNA (guanosine(18)-2'-O)-methyltransferase_trmH_1_                  |
| UDP-N-acetylmuramoylalanine--D-glutamate ligase_murD_2_                  | hypothetical protein_group_800_                                                                                           | tRNA (guanosine(18)-2'-O)-methyltransferase_trmH_2_                  |
| Undecaprenyl-diphosphatase_uppP_                                         | hypothetical protein_group_804_                                                                                           | tRNA dimethylallyltransferase_miaA_                                  |
| UTP--glucose-1-phosphate uridylyltransferase_gtaB_2_                     | hypothetical protein_group_830_                                                                                           | tRNA N6-adenosine threonylcarbamoyltransferase_tsaD_                 |
| UvrABC system protein A_uvrA_                                            | hypothetical protein_group_835_                                                                                           | tRNA pseudouridine synthase B_truB_                                  |
| UvrABC system protein B_uvrB_                                            | hypothetical protein_group_862_                                                                                           | tRNA threonylcarbamoyladenine biosynthesis protein TsaB_tsaB_        |
| UvrABC system protein C_uvrC_                                            | UDP-N-acetylenolpyruvoylglucosamine reductase_murB_                                                                       | tRNA threonylcarbamoyladenine biosynthesis protein TsaE_tsaE_        |
| Valine--tRNA ligase_valS_                                                | UDP-N-acetylglucosamine 1-carboxyvinyltransferase 1_murAA_                                                                | tRNA-specific 2-thiouridylase MnmA_mnmA_                             |
| Type II secretion system protein F_epsF_2_                               | UDP-N-acetylglucosamine--N-acetylmuramyl-(pentapeptide) pyrophosphoryl-undecaprenol N-acetylglucosamine transferase_murG_ | tRNA(Ile)-lysine synthase_tilS_                                      |
| Tyrosine recombinase XerD_xerD_                                          | UDP-N-acetylmuramate--L-alanine ligase_murC_                                                                              | Tryptophan--tRNA ligase_trpS_                                        |
| Tyrosine--tRNA ligase_tyrS_                                              | UDP-N-acetylmuramoyl-L-alanyl-D-glutamate--2,6-diaminopimelate ligase_murE_                                               | Twitching motility protein_pilT_                                     |
| UDP-glucose:undecaprenyl-phosphate glucose-1-phosphate transferase_wcaJ_ | UDP-N-acetylmuramoyl-tripeptide--D-alanyl-D-alanine ligase_murF_2_                                                        | Type 4 prepilin-like proteins leader peptide-processing enzyme_comC_ |
| Type II secretion system protein F_epsF_1_                               | UDP-N-acetylmuramoylalanine--D-glutamate ligase_murD_1_                                                                   | Type II secretion system protein E_xpsE_1_                           |
| Type II secretion system protein E_xpsE_3_                               | Type II secretion system protein E_xpsE_2_                                                                                |                                                                      |













**Table 6.** Unique genes comparing full/near complete genomes of TM7x, BB001, AC001 and PM004.

| <b>TM7x_110 genes</b> (84 (76.4%) hypothetical)*                           | <b>BB001_150 genes</b> (111 (74%) hypothetical)*                                  | <b>AC001_279 genes</b> (216 (77.4%) hypothetical)*                                | <b>PM004_273 genes</b> (190 (69.6%) hypothetical)**           |
|----------------------------------------------------------------------------|-----------------------------------------------------------------------------------|-----------------------------------------------------------------------------------|---------------------------------------------------------------|
| Superoxide dismutase [Mn] <i>sodA</i>                                      | hypothetical protein_group_1014                                                   | hypothetical protein_group_1110                                                   | hypothetical protein_group_210                                |
| 2-succinyl-6-hydroxy-2,4-cyclohexadiene-1-carboxylate synthase <i>lip1</i> | (2E,6E)-farnesyl diphosphate synthase <i>sdsA</i>                                 | hypothetical protein_group_947                                                    | hypothetical protein_group_104                                |
| ABC transporter ATP-binding protein <i>uup_uup</i>                         | <b>ATP-dependent RNA helicase</b> <i>RhIE_rhIE</i>                                | hypothetical protein_group_1092                                                   | putative HIT-like protein_group_518                           |
| Acetyltransferase <i>YpeA_ypeA</i>                                         | hypothetical protein_group_1292                                                   | hypothetical protein_group_965                                                    | Lipid II:glycine glycytransferase <i>femX_2</i>               |
| Arginine deiminase_group_358 <i>arcA</i>                                   | hypothetical protein_group_1273                                                   | hypothetical protein_group_1081                                                   | hypothetical protein_group_1173                               |
| ATP-dependent zinc metalloprotease <i>FtsH_1_ftsH4</i>                     | hypothetical protein_group_1306                                                   | Type II secretion system protein <i>G_epsG</i>                                    | hypothetical protein_group_1256                               |
| Autolysin <i>lytA</i>                                                      | hypothetical protein_group_1307                                                   | Phosphatase <i>NudJ_nudJ</i>                                                      | hypothetical protein_group_1033                               |
| Energy-dependent translational throttle protein <i>EttA_group_27_ettA</i>  | Phytoene synthase <i>crtB</i>                                                     | hypothetical protein_group_rpf2                                                   | Cytidylate kinase <i>cmk</i>                                  |
| Glucose-1-phosphate thymidyltransferase <i>1_rfbA</i>                      | zeta-carotene-forming phytoene desaturase <i>carA2</i>                            | hypothetical protein_group_971                                                    | Thymidine kinase <i>tdk</i>                                   |
| Glycerol-3-phosphate cytidyltransferase <i>tagD</i>                        | hypothetical protein_group_1303                                                   | <b>Modification methylase</b> <i>Hhal_hhalm</i>                                   | putative MscS family protein <i>YkuT_ykuT_1</i>               |
| hypothetical protein_group_glcA                                            | hypothetical protein_group_1302                                                   | hypothetical protein_group_1101                                                   | hypothetical protein_group_1176                               |
| hypothetical protein_group_1125                                            | 4-hydroxybenzoate octaprenyltransferase <i>ubiA</i>                               | hypothetical protein_group_204                                                    | hypothetical protein_group_1037                               |
| hypothetical protein_group_1137                                            | Adenosine deaminase <i>add</i>                                                    | hypothetical protein_group_977                                                    | hypothetical protein_group_1142                               |
| hypothetical protein_group_1148 <i>htrA</i>                                | Argininosuccinate synthase <i>argG</i>                                            | Large cysteine-rich periplasmic protein <i>OmcB_group_195_omcB</i>                | hypothetical protein_group_352                                |
| hypothetical protein_group_1323                                            | Argininosuccinate lyase <i>argH</i>                                               | Folypolyglutamate synthase <i>fpgS</i>                                            | hypothetical protein_group_1041                               |
| hypothetical protein_group_1357                                            | Undecaprenyl-phosphate 4-deoxy-4-formamido-L-arabinose transferase <i>arnC</i>    | Divalent-cation tolerance protein <i>CutA_cutA</i>                                | Cardiolipin synthase <i>B_clsB</i>                            |
| hypothetical protein_group_1444                                            | Beta-glucanase <i>bgIA</i>                                                        | putative ABC transporter ATP-binding protein <i>YbhF_ybhF_3</i>                   | hypothetical protein_group_1044                               |
| hypothetical protein_group_1445                                            | Copper-exporting P-type ATPase <i>A_copA_2</i>                                    | Glutamine--fructose-6-phosphate aminotransferase [isomerizing] <i>glmS</i>        | S-adenosylmethionine synthase <i>metK</i>                     |
| hypothetical protein_group_1446                                            | Bifunctional hemolysin/adenylate cyclase <i>cya</i>                               | Internalin-A <i>inIA_1</i>                                                        | Zinc transporter <i>ZupT_zupT</i>                             |
| hypothetical protein_group_1447                                            | HTH-type transcriptional regulator <i>CymR_cymR</i>                               | hypothetical protein_group_1247                                                   | hypothetical protein_group_1045                               |
| hypothetical protein_group_2629                                            | hypothetical protein_group_1000                                                   | Staphylococcal secretory antigen <i>SsaA_ssaA</i>                                 | hypothetical protein_group_932                                |
| hypothetical protein_group_2630                                            | hypothetical protein_group_1001                                                   | hypothetical protein_group_368                                                    | hypothetical protein_group_724                                |
| hypothetical protein_group_2631                                            | hypothetical protein_group_1009                                                   | hypothetical protein_group_370                                                    | Xaa-Pro aminopeptidase <i>pepP</i>                            |
| hypothetical protein_group_2632                                            | hypothetical protein_group_1010                                                   | hypothetical protein_group_1249                                                   | 50S ribosomal protein <i>L25_rplY</i>                         |
| hypothetical protein_group_2633                                            | hypothetical protein_group_110                                                    | hypothetical protein_group_97                                                     | Type II secretion system protein <i>G_pulG_9</i>              |
| hypothetical protein_group_2634                                            | Riboflavin biosynthesis protein_group_1122                                        | hypothetical protein_group_1250                                                   | hypothetical protein_group_1156                               |
| hypothetical protein_group_2635                                            | hypothetical protein_group_1127                                                   | HTH-type transcriptional activator <i>HxIR_hxIR_1</i>                             | hypothetical protein_group_1049                               |
| hypothetical protein_group_2636                                            | hypothetical protein_group_1128                                                   | Phosphoglucomutase <i>pgcA</i>                                                    | hypothetical protein_group_145                                |
| hypothetical protein_group_2637                                            | Daunorubicin/doxorubicin resistance ATP-binding protein <i>DrrA_group_12_ybhF</i> | hypothetical protein_group_1090                                                   | hypothetical protein_group_1182                               |
| hypothetical protein_group_2638                                            | hypothetical protein_group_1270                                                   | Multidrug resistance ABC transporter ATP-binding and permease protein <i>ImrA</i> | hypothetical protein_group_1158                               |
| hypothetical protein_group_2639                                            | hypothetical protein_group_1276                                                   | hypothetical protein_group_979                                                    | DNA polymerase IV <i>dinB1</i>                                |
| hypothetical protein_group_2640                                            | hypothetical protein_group_1277                                                   | Nicotinamidase <i>pncA</i>                                                        | hypothetical protein_group_931                                |
| hypothetical protein_group_2641                                            | hypothetical protein_group_1278                                                   | Nicotinate phosphoribosyltransferase <i>pncB</i>                                  | hypothetical protein_group_1160                               |
| hypothetical protein_group_2642                                            | hypothetical protein_group_1279                                                   | Non-canonical purine NTP pyrophosphatase <i>rdgB_1</i>                            | hypothetical protein_group_1054                               |
| hypothetical protein_group_2643                                            | hypothetical protein_group_1282                                                   | hypothetical protein_group_1223                                                   | Xylulose-5-phosphate phosphoketolase <i>xpkA</i>              |
| hypothetical protein_group_2644                                            | hypothetical protein_group_1283                                                   | hypothetical protein_group_1084                                                   | putative adenyltransferase/sulfurtransferase <i>MoeZ_moeZ</i> |
| hypothetical protein_group_2645                                            | hypothetical protein_group_1293                                                   | Response regulator <i>MprA_mprA</i>                                               | hypothetical protein_group_843                                |

|                                  |                                  |                                                            |                                                                   |
|----------------------------------|----------------------------------|------------------------------------------------------------|-------------------------------------------------------------------|
| hypothetical protein_group_2646_ | hypothetical protein_group_1296_ | Signal-transduction histidine kinase senX3_senX3           | hypothetical protein_group_1061_                                  |
| hypothetical protein_group_2647_ | hypothetical protein_group_1297_ | Bis(5'-nucleosyl)-tetrphosphatase, symmetrical_apaH_       | Polyprenol monophosphomannose synthase_group_191_epsH_            |
| hypothetical protein_group_2648_ | hypothetical protein_group_1299_ | Arginine deiminase_arcA_                                   | N-acetyl-alpha-D-glucosaminyl L-malate synthase_tagE_             |
| hypothetical protein_group_2649_ | hypothetical protein_group_1300_ | N-acetyl-alpha-D-glucosaminyl L-malate synthase_bshA_      | GDP-mannose 4,6-dehydratase_gmd_                                  |
| hypothetical protein_group_2651_ | hypothetical protein_group_1585_ | Competence protein ComM_comM_2_                            | hypothetical protein_group_1168_                                  |
| hypothetical protein_group_2653_ | hypothetical protein_group_1586_ | Cyanophycin synthetase_cphA_                               | Mannosylfructose-phosphate synthase_mshA_3_                       |
| hypothetical protein_group_2654_ | hypothetical protein_group_1587_ | Peptide deformylase_defB_                                  | hypothetical protein_group_841_                                   |
| hypothetical protein_group_2655_ | hypothetical protein_group_1588_ | Toxin Doc_doc_                                             | Murein DD-endopeptidase MepM_mepM_                                |
| hypothetical protein_group_2656_ | hypothetical protein_group_1590_ | ADP-ribosyl-[dinitrogen reductase] glycohydrolase_draG_    | Deoxyuridine 5'-triphosphate nucleotidohydrolase_dut_             |
| hypothetical protein_group_2657_ | hypothetical protein_group_1593_ | Energy-dependent translational throttle protein EttA_ettA_ | hypothetical protein_group_1315_                                  |
| hypothetical protein_group_2658_ | hypothetical protein_group_1594_ | Ethanolamine utilization protein EutD_eutD_                | hypothetical protein_group_757_                                   |
| hypothetical protein_group_2660_ | hypothetical protein_group_1595_ | 3-oxoacyl-[acyl-carrier-protein] reductase FabG_fabG_      | putative sulfate transporter_group_791_                           |
| hypothetical protein_group_2661_ | hypothetical protein_group_1596_ | Adenosine monophosphate-protein transferase SoFic_fic_     | putative ABC transporter ATP-binding protein YknY_group_1_macB_2_ |
| hypothetical protein_group_2662_ | hypothetical protein_group_1597_ | Glycogen synthase_glgA_                                    | Protease HtpX_htpX_1_                                             |
| hypothetical protein_group_2663_ | hypothetical protein_group_1598_ | hypothetical protein_group_1077_                           | Lipase 3_lip3_1_                                                  |
| hypothetical protein_group_2664_ | hypothetical protein_group_1599_ | hypothetical protein_group_1079_                           | Putative carboxypeptidase YodJ_yodJ_                              |
| hypothetical protein_group_2665_ | hypothetical protein_group_1600_ | hypothetical protein_group_1094_                           | Fimbrial protein_pilE1_2_                                         |
| hypothetical protein_group_2666_ | hypothetical protein_group_1601_ | hypothetical protein_group_1096_                           | hypothetical protein_group_1149_                                  |
| hypothetical protein_group_2667_ | hypothetical protein_group_1602_ | hypothetical protein_group_1118_                           | Glycerophosphodiester phosphodiesterase_glpQ_                     |
| hypothetical protein_group_2668_ | hypothetical protein_group_1603_ | hypothetical protein_group_1192_                           | hypothetical protein_group_1347_                                  |
| hypothetical protein_group_2669_ | hypothetical protein_group_1605_ | hypothetical protein_group_1195_                           | D-inositol 3-phosphate glycosyltransferase_mshA_1_                |
| hypothetical protein_group_2670_ | hypothetical protein_group_1606_ | hypothetical protein_group_1196_                           | hypothetical protein_group_1047_                                  |
| hypothetical protein_group_2671_ | hypothetical protein_group_1607_ | hypothetical protein_group_1197_                           | hypothetical protein_group_1371_                                  |
| hypothetical protein_group_2672_ | hypothetical protein_group_1608_ | hypothetical protein_group_1198_                           | hypothetical protein_group_1375_                                  |
| hypothetical protein_group_2673_ | hypothetical protein_group_1609_ | hypothetical protein_group_1199_                           | Succinate--CoA ligase [GDP-forming] subunit beta_sucC_            |
| hypothetical protein_group_2674_ | hypothetical protein_group_1610_ | hypothetical protein_group_1200_                           | Succinate--CoA ligase [ADP-forming] subunit alpha_sucD_           |
| hypothetical protein_group_2675_ | hypothetical protein_group_1611_ | hypothetical protein_group_1202_                           | Phosphatidyl-myo-inositol mannosyltransferase_pimA_2_             |
| hypothetical protein_group_2676_ | hypothetical protein_group_1612_ | hypothetical protein_group_1203_                           | 50S ribosomal protein L34_rpmH_                                   |
| hypothetical protein_group_2677_ | hypothetical protein_group_1613_ | hypothetical protein_group_1204_                           | hypothetical protein_group_2009_                                  |
| hypothetical protein_group_2678_ | hypothetical protein_group_1614_ | hypothetical protein_group_1205_                           | hypothetical protein_group_2010_                                  |
| hypothetical protein_group_2679_ | hypothetical protein_group_1615_ | hypothetical protein_group_1207_                           | hypothetical protein_group_106_                                   |
| hypothetical protein_group_2680_ | hypothetical protein_group_1616_ | hypothetical protein_group_1208_                           | hypothetical protein_group_1384_                                  |
| hypothetical protein_group_2681_ | hypothetical protein_group_1617_ | hypothetical protein_group_1209_                           | hypothetical protein_group_100_                                   |
| hypothetical protein_group_2682_ | hypothetical protein_group_1618_ | hypothetical protein_group_1214_                           | hypothetical protein_group_2011_                                  |
| hypothetical protein_group_2683_ | hypothetical protein_group_1620_ | hypothetical protein_group_1215_                           | hypothetical protein_group_2012_                                  |
| hypothetical protein_group_2684_ | hypothetical protein_group_1621_ | hypothetical protein_group_1216_                           | hypothetical protein_group_1378_                                  |
| hypothetical protein_group_2685_ | hypothetical protein_group_1622_ | hypothetical protein_group_1218_                           | hypothetical protein_group_2013_                                  |
| hypothetical protein_group_2686_ | hypothetical protein_group_1623_ | hypothetical protein_group_1220_                           | hypothetical protein_group_2014_                                  |
| hypothetical protein_group_2688_ | hypothetical protein_group_1624_ | hypothetical protein_group_1221_                           | Ribosome-associated ATPase_rbbA_1_                                |
| hypothetical protein_group_2689_ | hypothetical protein_group_1625_ | hypothetical protein_group_1227_                           | hypothetical protein_group_1385_                                  |
| hypothetical protein_group_2690_ | hypothetical protein_group_1626_ | hypothetical protein_group_1230_                           | hypothetical protein_group_1346_                                  |
| hypothetical protein_group_2691_ | hypothetical protein_group_1627_ | hypothetical protein_group_1232_                           | hypothetical protein_group_2015_                                  |

|                                                                                 |                                  |                                                         |                                                                       |
|---------------------------------------------------------------------------------|----------------------------------|---------------------------------------------------------|-----------------------------------------------------------------------|
| hypothetical protein_group_2692_                                                | hypothetical protein_group_1628_ | hypothetical protein_group_1235_                        | Transcription elongation factor GreA_group_2016_greA_1                |
| hypothetical protein_group_2693_                                                | hypothetical protein_group_1629_ | hypothetical protein_group_1237_                        | Non-canonical purine NTP pyrophosphatase_group_251_                   |
| hypothetical protein_group_2694_                                                | hypothetical protein_group_1630_ | hypothetical protein_group_1239_                        | Anti-sigma-I factor RsgI2_group_2017_rsgI2                            |
| hypothetical protein_group_2695_                                                | hypothetical protein_group_1631_ | hypothetical protein_group_1240_                        | hypothetical protein_group_2018_                                      |
| hypothetical protein_group_2696_                                                | hypothetical protein_group_1632_ | hypothetical protein_group_1242_                        | hypothetical protein_group_2019_                                      |
| hypothetical protein_group_2697_                                                | hypothetical protein_group_1633_ | hypothetical protein_group_1243_                        | hypothetical protein_group_2020_                                      |
| hypothetical protein_group_2699_                                                | hypothetical protein_group_1634_ | hypothetical protein_group_1245_                        | hypothetical protein_group_1386_                                      |
| hypothetical protein_group_2700_                                                | hypothetical protein_group_1636_ | hypothetical protein_group_1251_                        | hypothetical protein_group_1387_                                      |
| hypothetical protein_group_354_                                                 | hypothetical protein_group_1637_ | hypothetical protein_group_1252_                        | hypothetical protein_group_1388_                                      |
| hypothetical protein_group_413_                                                 | hypothetical protein_group_1638_ | hypothetical protein_group_1259_                        | hypothetical protein_group_2021_                                      |
| hypothetical protein_group_414_                                                 | hypothetical protein_group_1639_ | hypothetical protein_group_1260_                        | hypothetical protein_group_2022_                                      |
| hypothetical protein_group_415_                                                 | hypothetical protein_group_1640_ | hypothetical protein_group_1263_                        | hypothetical protein_group_2023_                                      |
| hypothetical protein_group_562_                                                 | hypothetical protein_group_1641_ | hypothetical protein_group_1264_                        | hypothetical protein_group_1389_                                      |
| hypothetical protein_group_574_                                                 | hypothetical protein_group_1642_ | hypothetical protein_group_1265_                        | hypothetical protein_group_2024_                                      |
| hypothetical protein_group_836_                                                 | hypothetical protein_group_1643_ | hypothetical protein_group_1266_                        | hypothetical protein_group_859_                                       |
| Non-canonical purine NTP pyrophosphatase_group_249_                             | hypothetical protein_group_1644_ | hypothetical protein_group_1267_                        | hypothetical protein_group_2025_                                      |
| Polyamine aminopropyltransferase_group_2652_speE                                | hypothetical protein_group_1645_ | Alpha-monoglucosyldiacylglycerol synthase_group_128_mgs | hypothetical protein_group_2026_                                      |
| putative ABC transporter ATP-binding protein_group_15_                          | hypothetical protein_group_1646_ | hypothetical protein_group_1448_                        | hypothetical protein_group_2027_                                      |
| putative glycosyltransferase_group_184_                                         | hypothetical protein_group_1648_ | hypothetical protein_group_1449_                        | hypothetical protein_group_2028_                                      |
| <b>putative type I restriction enzyme P M protein_group_1167_</b>               | hypothetical protein_group_1649_ | hypothetical protein_group_1450_                        | hypothetical protein_group_1390_                                      |
| <b>putative type I restriction enzyme P M protein_hsdM_</b>                     | hypothetical protein_group_1650_ | hypothetical protein_group_1451_                        | hypothetical protein_group_2029_                                      |
| <b>Putative type-1 restriction enzyme specificity protein MG438_group_2698_</b> | hypothetical protein_group_1651_ | hypothetical protein_group_1452_                        | Lipoprotein-releasing system ATP-binding protein LoID_group_31_loID_1 |
| Ribosomal protein S6--L-glutamate ligase_gshB_                                  | hypothetical protein_group_1652_ | hypothetical protein_group_1453_                        | hypothetical protein_group_872_                                       |
| RNA pyrophosphohydrolase_group_141_rppH_2                                       | hypothetical protein_group_1653_ | hypothetical protein_group_1454_                        | hypothetical protein_group_2030_                                      |
| S-adenosylmethionine decarboxylase proenzyme_speH_                              | hypothetical protein_group_1656_ | hypothetical protein_group_1455_                        | hypothetical protein_group_2031_                                      |
| Sensor kinase CusS_group_77_cusS                                                | hypothetical protein_group_1657_ | hypothetical protein_group_1456_                        | hypothetical protein_group_392_inIA                                   |
| Sensory transduction protein regX3_group_86_regX3                               | hypothetical protein_group_1658_ | hypothetical protein_group_1457_                        | RNA pyrophosphohydrolase_group_868_rppH_3                             |
| Transcriptional regulator WhiD_whiB4_                                           | hypothetical protein_group_1659_ | hypothetical protein_group_1458_                        | hypothetical protein_group_2032_                                      |
| <b>Type I restriction enzyme EcoR124II R protein_hsdR_2_</b>                    | hypothetical protein_group_1660_ | hypothetical protein_group_1459_                        | <b>CRISPR-associated endoribonuclease Cas2_cas2_</b>                  |
| Type-1 restriction enzyme R protein_hsdR_1_                                     | hypothetical protein_group_1661_ | hypothetical protein_group_1460_                        | <b>CRISPR-associated endonuclease Cas1_cas1_</b>                      |
| Tyrosine recombinase XerC_xerC_                                                 | hypothetical protein_group_1663_ | hypothetical protein_group_1461_                        | <b>CRISPR-associated endonuclease Cas9_cas9_</b>                      |
|                                                                                 | hypothetical protein_group_1664_ | hypothetical protein_group_1462_                        | hypothetical protein_group_2036_                                      |
|                                                                                 | hypothetical protein_group_1666_ | hypothetical protein_group_1464_                        | Chromosome partition protein Smc_smc_                                 |
|                                                                                 | hypothetical protein_group_1667_ | hypothetical protein_group_1465_                        | hypothetical protein_group_2038_                                      |
|                                                                                 | hypothetical protein_group_1668_ | hypothetical protein_group_1466_                        | hypothetical protein_group_2039_                                      |
|                                                                                 | hypothetical protein_group_1669_ | hypothetical protein_group_1467_                        | hypothetical protein_group_2040_                                      |
|                                                                                 | hypothetical protein_group_1670_ | hypothetical protein_group_1468_                        | hypothetical protein_group_2041_                                      |
|                                                                                 | hypothetical protein_group_1671_ | hypothetical protein_group_1469_                        | hypothetical protein_group_2042_                                      |
|                                                                                 | hypothetical protein_group_1672_ | hypothetical protein_group_1470_                        | hypothetical protein_group_2043_                                      |
|                                                                                 | hypothetical protein_group_1673_ | hypothetical protein_group_1471_                        | Adenylosuccinate synthetase_purA_                                     |
|                                                                                 | hypothetical protein_group_1674_ | hypothetical protein_group_1472_                        | hypothetical protein_group_2045_                                      |

|  |                                                                       |                                  |                                                           |
|--|-----------------------------------------------------------------------|----------------------------------|-----------------------------------------------------------|
|  | hypothetical protein_group_1675_                                      | hypothetical protein_group_1473_ | hypothetical protein_group_2046_                          |
|  | hypothetical protein_group_1676_                                      | hypothetical protein_group_1474_ | Protease HtpX_htpX_2_                                     |
|  | hypothetical protein_group_1678_                                      | hypothetical protein_group_1475_ | hypothetical protein_group_2047_                          |
|  | hypothetical protein_group_1680_                                      | hypothetical protein_group_1476_ | hypothetical protein_group_2048_                          |
|  | putative ABC transporter ATP-binding protein_group_17_                | hypothetical protein_group_1477_ | hypothetical protein_group_2049_                          |
|  | hypothetical protein_group_194_                                       | hypothetical protein_group_1478_ | Phosphoserine phosphatase SerB1_serB1_2_                  |
|  | Glucose-1-phosphate thymidyltransferase 1_group_259_rfbA              | hypothetical protein_group_1479_ | hypothetical protein_group_2050_                          |
|  | Putative carboxypeptidase YodJ_group_302_yodJ_1                       | hypothetical protein_group_1480_ | PGL/p-HBAD biosynthesis glycosyltransferase_group_186_    |
|  | putative FAD-linked oxidoreductase_group_317_                         | hypothetical protein_group_1481_ | hypothetical protein_group_1392_                          |
|  | Lipoprotein-releasing system ATP-binding protein LolD_group_32_lolD_2 | hypothetical protein_group_1482_ | hypothetical protein_group_1393_                          |
|  | hypothetical protein_group_333_                                       | hypothetical protein_group_1483_ | hypothetical protein_group_2051_                          |
|  | hypothetical protein_group_573_                                       | hypothetical protein_group_1484_ | Type II secretion system protein G_xcpT_1_                |
|  | Signal transduction histidine-protein kinase ArlS_group_75_arlS       | hypothetical protein_group_1485_ | Acetate kinase_ackA_                                      |
|  | hypothetical protein_group_845_                                       | hypothetical protein_group_1486_ | rRNA adenine N-6-methyltransferase_ermA1_                 |
|  | Response regulator MprA_group_85_mprA                                 | hypothetical protein_group_1487_ | hypothetical protein_group_1395_                          |
|  | GMP synthase [glutamine-hydrolyzing]_guaA_                            | hypothetical protein_group_1488_ | hypothetical protein_group_2052_                          |
|  | Ycf48-like protein_hcf136_                                            | hypothetical protein_group_1489_ | hypothetical protein_group_2053_                          |
|  | Hemolysin secretion protein D, chromosomal_hlyD_                      | hypothetical protein_group_1490_ | hypothetical protein_group_2054_                          |
|  | Tyrosine recombinase XerC_Int-Tn_                                     | hypothetical protein_group_1491_ | N-acetylmuramoyl-L-alanine amidase sle1_group_340_sle1_1_ |
|  | Penicillin-binding protein 4*_pbpE_                                   | hypothetical protein_group_1492_ | hypothetical protein_group_1396_                          |
|  | Serine/threonine-protein kinase pkn5_pkn5_                            | hypothetical protein_group_1493_ | hypothetical protein_group_1397_                          |
|  | dTDP-glucose 4,6-dehydratase_rmlB_                                    | hypothetical protein_group_1494_ | hypothetical protein_group_2055_                          |
|  | Anti-sigma-I factor RsgI2_rsgI2_                                      | hypothetical protein_group_1495_ | hypothetical protein_group_2056_                          |
|  | Ribosomal RNA small subunit methyltransferase F_rsmF_                 | hypothetical protein_group_1496_ | hypothetical protein_group_2057_                          |
|  | Serine 3-dehydrogenase_sdh_                                           | hypothetical protein_group_1497_ | Urease accessory protein UreG_ureG_                       |
|  | tRNA-specific adenosine deaminase_tadA_                               | hypothetical protein_group_1498_ | hypothetical protein_group_2059_                          |
|  | dTDP-6-deoxy-L-talose 4-dehydrogenase (NAD( ))_tlI_                   | hypothetical protein_group_1499_ | Inorganic triphosphatase_group_2060_                      |
|  | putative transcriptional regulatory protein YedW_yedW_2_              | hypothetical protein_group_1500_ | hypothetical protein_group_2061_                          |
|  | ABC transporter ATP-binding protein YtrB_ytrB_                        | hypothetical protein_group_1501_ | hypothetical protein_group_2062_                          |
|  | ESX secretion system protein YueB_yueB_                               | hypothetical protein_group_1502_ | hypothetical protein_group_2063_                          |
|  |                                                                       | hypothetical protein_group_1503_ | hypothetical protein_group_2064_                          |
|  |                                                                       | hypothetical protein_group_1504_ | hypothetical protein_group_1398_                          |
|  |                                                                       | hypothetical protein_group_1505_ | hypothetical protein_group_2065_                          |
|  |                                                                       | hypothetical protein_group_1506_ | Thymidylate kinase_tnk_2_                                 |
|  |                                                                       | hypothetical protein_group_1507_ | hypothetical protein_group_57_                            |
|  |                                                                       | hypothetical protein_group_1508_ | hypothetical protein_group_2067_                          |
|  |                                                                       | hypothetical protein_group_1509_ | hypothetical protein_group_1399_                          |
|  |                                                                       | hypothetical protein_group_1510_ | hypothetical protein_group_2068_                          |
|  |                                                                       | hypothetical protein_group_1511_ | hypothetical protein_group_1177_                          |
|  |                                                                       | hypothetical protein_group_1512_ | hypothetical protein_group_1178_                          |
|  |                                                                       | hypothetical protein_group_1513_ | hypothetical protein_group_2069_                          |
|  |                                                                       | hypothetical protein_group_1514_ | hypothetical protein_group_2070_                          |
|  |                                                                       | hypothetical protein_group_1515_ | TVP38/TMEM64 family inner membrane protein YdjZ_ydjZ_     |

|  |                                    |                                                              |
|--|------------------------------------|--------------------------------------------------------------|
|  | hypothetical protein_group_1516_   | hypothetical protein_group_2072_                             |
|  | hypothetical protein_group_1517_   | hypothetical protein_group_2073_                             |
|  | hypothetical protein_group_1518_   | hypothetical protein_group_2074_                             |
|  | hypothetical protein_group_1519_   | S-adenosylmethionine:tRNA ribosyltransferase-isomerase_queA_ |
|  | hypothetical protein_group_1520_   | hypothetical protein_group_2075_                             |
|  | hypothetical protein_group_1521_   | hypothetical protein_group_1401_                             |
|  | hypothetical protein_group_1522_   | hypothetical protein_group_2076_                             |
|  | hypothetical protein_group_1523_   | hypothetical protein_group_2077_                             |
|  | hypothetical protein_group_1524_   | hypothetical protein_group_1062_                             |
|  | hypothetical protein_group_1525_   | hypothetical protein_group_1064_                             |
|  | hypothetical protein_group_1526_   | hypothetical protein_group_1065_                             |
|  | hypothetical protein_group_1527_   | hypothetical protein_group_1063_                             |
|  | hypothetical protein_group_1528_   | hypothetical protein_group_2078_                             |
|  | hypothetical protein_group_1529_   | hypothetical protein_group_1402_                             |
|  | hypothetical protein_group_1530_   | hypothetical protein_group_2079_                             |
|  | hypothetical protein_group_1531_   | Histidine--tRNA ligase_hisS_2_                               |
|  | hypothetical protein_group_1532_   | hypothetical protein_group_2080_                             |
|  | hypothetical protein_group_1533_   | hypothetical protein_group_2081_                             |
|  | hypothetical protein_group_1534_   | hypothetical protein_group_1403_                             |
|  | hypothetical protein_group_1535_   | hypothetical protein_group_2082_                             |
|  | hypothetical protein_group_1536_   | Bifunctional (p)ppGpp synthase/hydrolase RelA_relA_2_        |
|  | hypothetical protein_group_1537_   | hypothetical protein_group_2083_                             |
|  | hypothetical protein_group_1538_   | hypothetical protein_group_2084_                             |
|  | hypothetical protein_group_1539_   | hypothetical protein_group_2085_                             |
|  | hypothetical protein_group_1540_   | hypothetical protein_group_906_                              |
|  | hypothetical protein_group_1541_   | Proline iminopeptidase_pip_                                  |
|  | hypothetical protein_group_1542_   | Nucleoid occlusion factor SlmA_slmA_                         |
|  | hypothetical protein_group_1543_   | Putative aminoacrylate hydrolase RutD_rutD_2_                |
|  | Cardiolipin synthase_group_1544_   | hypothetical protein_group_2089_                             |
|  | hypothetical protein_group_1545_   | Putative mutator protein MutT4_mutT4_2_                      |
|  | hypothetical protein_group_1546_   | hypothetical protein_group_2090_                             |
|  | hypothetical protein_group_1547_   | hypothetical protein_group_2091_                             |
|  | hypothetical protein_group_1548_   | hypothetical protein_group_1377_                             |
|  | hypothetical protein_group_1549_   | hypothetical protein_group_2092_                             |
|  | hypothetical protein_group_1550_   | hypothetical protein_group_2093_                             |
|  | hypothetical protein_group_1551_   | dTDP-fucosamine acetyltransferase_wecD_                      |
|  | hypothetical protein_group_1552_   | hypothetical protein_group_2094_                             |
|  | hypothetical protein_group_1553_   | hypothetical protein_group_2095_                             |
|  | hypothetical protein_group_1554_   | D-alanyl-D-alanine carboxypeptidase_group_2096_              |
|  | hypothetical protein_group_1555_   | hypothetical protein_group_2097_                             |
|  | hypothetical protein_group_1556_   | hypothetical protein_group_2098_                             |
|  | hypothetical protein_group_1558_   | hypothetical protein_group_2099_                             |
|  | hypothetical protein_group_1559_   | Type II secretion system protein G_xcpT_2_                   |
|  | hypothetical protein_group_1560_   | hypothetical protein_group_576_                              |
|  | hypothetical protein_group_1561_   | hypothetical protein_group_998_                              |
|  | hypothetical protein_group_1562_   | hypothetical protein_group_792_                              |
|  | hypothetical protein_group_1563_   | Septum formation protein Maf_maf_                            |
|  | hypothetical protein_group_1564_   | hypothetical protein_group_2101_                             |
|  | hypothetical protein_group_1565_   | hypothetical protein_group_2102_                             |
|  | hypothetical protein_group_1566_   | hypothetical protein_group_2103_                             |
|  | hypothetical protein_group_1567_   | hypothetical protein_group_2104_                             |
|  | Lysine--tRNA ligase_group_1568_lyS | hypothetical protein_group_2105_                             |



|  |                                                                  |                                                               |
|--|------------------------------------------------------------------|---------------------------------------------------------------|
|  | hypothetical protein_group_1569_                                 | hypothetical protein_group_999_                               |
|  | hypothetical protein_group_1570_                                 | hypothetical protein_group_2106_                              |
|  | hypothetical protein_group_1571_                                 | hypothetical protein_group_2107_                              |
|  | hypothetical protein_group_1572_                                 | hypothetical protein_group_1404_                              |
|  | hypothetical protein_group_1573_                                 | RNA<br>pyrophosphohydrolase_group_2108_rppH_4                 |
|  | hypothetical protein_group_1574_                                 | hypothetical protein_group_2109_                              |
|  | hypothetical protein_group_1575_                                 | hypothetical protein_group_2110_                              |
|  | hypothetical protein_group_1577_                                 | Fluorothreonine transaldolase_group_423_                      |
|  | hypothetical protein_group_1578_                                 | hypothetical protein_group_2111_                              |
|  | hypothetical protein_group_1579_                                 | hypothetical protein_group_2112_                              |
|  | hypothetical protein_group_1580_                                 | hypothetical protein_group_2113_                              |
|  | Undecaprenyl-phosphate<br>mannosyltransferase_group_1581_        | hypothetical protein_group_2114_                              |
|  | hypothetical protein_group_1582_                                 | hypothetical protein_group_2115_                              |
|  | hypothetical protein_group_1583_                                 | hypothetical protein_group_327_                               |
|  | hypothetical protein_group_1584_                                 | hypothetical protein_group_284_                               |
|  | Lipase 1_group_220_                                              | hypothetical protein_group_2116_                              |
|  | hypothetical protein_group_222_                                  | hypothetical protein_group_2117_                              |
|  | hypothetical protein_group_223_                                  | hypothetical protein_group_2118_                              |
|  | Lipase_group_226_                                                | hypothetical protein_group_2119_                              |
|  | hypothetical protein_group_254_                                  | hypothetical protein_group_2120_                              |
|  | Aspartate--tRNA ligase_group_278_aspS                            | Magnesium and cobalt efflux protein<br>CorC_group_289_corC_1  |
|  | hypothetical protein_group_311_                                  | hypothetical protein_group_2121_                              |
|  | putative oxidoreductase_group_398_                               | Glucose-1-phosphate adenyltransferase_glgC_                   |
|  | hypothetical protein_group_402_                                  | ADP-ribose pyrophosphatase_group_475_act                      |
|  | hypothetical protein_group_430_                                  | Elongation factor 4_group_117_lepA_1                          |
|  | Isoleucine--tRNA ligase 2_group_439_ileS2                        | hypothetical protein_group_2123_                              |
|  | hypothetical protein_group_560_                                  | hypothetical protein_group_2124_                              |
|  | hypothetical protein_group_575_                                  | hypothetical protein_group_2125_                              |
|  | hypothetical protein_group_578_                                  | hypothetical protein_group_2126_                              |
|  | hypothetical protein_group_81_                                   | hypothetical protein_group_2127_                              |
|  | hypothetical protein_group_817_                                  | hypothetical protein_group_2128_                              |
|  | hypothetical protein_group_818_                                  | ATP-dependent zinc metalloprotease<br>FtsH_group_347_ftsH     |
|  | hypothetical protein_group_819_                                  | hypothetical protein_group_2129_                              |
|  | hypothetical protein_group_860_                                  | hypothetical protein_group_1379_                              |
|  | aspartoacylase_group_864_                                        | hypothetical protein_group_2130_                              |
|  | hypothetical protein_group_969_                                  | hypothetical protein_group_1380_                              |
|  | hypothetical protein_group_973_                                  | hypothetical protein_group_2131_                              |
|  | hypothetical protein_group_974_                                  | hypothetical protein_group_2132_                              |
|  | hypothetical protein_group_98_                                   | Inner membrane protein YrbG_yrbG                              |
|  | hypothetical protein_group_986_                                  | Macrolide export ATP-binding/permease protein<br>MacB_macB_3_ |
|  | D-psicose 3-epimerase_group_996_                                 | HTH-type transcriptional regulator ImmR_immR_                 |
|  | Metallopeptidase ImmA_immA_                                      | hypothetical protein_group_2134_                              |
|  | Internalin-A_inIA_2_                                             | Sensor histidine kinase ResE_resE_2_                          |
|  | Lipoprotein-releasing system ATP-binding<br>protein LolD_lolD_3_ | Response regulator MprA_group_89_mprA                         |
|  | Diaminopimelate decarboxylase_lysA_                              | Phosphoglycolate phosphatase_gph_                             |
|  | Mercuric resistance operon regulatory<br>protein merR_           | Fatty acid metabolism regulator protein_fadR_                 |
|  | Mycothioli acetyltransferase_mshD_                               | hypothetical protein_group_291_                               |
|  | putative 8-oxo-dGTP diphosphatase 1_mutT1_                       | hypothetical protein_group_869_                               |

|  |  |                                                                          |                                  |
|--|--|--------------------------------------------------------------------------|----------------------------------|
|  |  | Putative 8-oxo-dGTP diphosphatase 2_mutT2_                               | hypothetical protein_group_2136_ |
|  |  | hypothetical protein_mutX_                                               | hypothetical protein_group_1405_ |
|  |  | NH(3)-dependent NAD( ) synthetase_nadE_                                  | Lipase 2_group_215_              |
|  |  | endonuclease 4_nfo_                                                      | hypothetical protein_group_2137_ |
|  |  | NADH pyrophosphatase_nudC_                                               | hypothetical protein_group_2138_ |
|  |  | Nucleoside triphosphatase NudI_nudI_                                     | hypothetical protein_group_2139_ |
|  |  | Oligoribonuclease_orn_2_                                                 | hypothetical protein_group_2140_ |
|  |  | dITP/XTP pyrophosphatase_rdgB_                                           | GDP-perosamine synthase_perA_    |
|  |  | Uridine kinase_udk_                                                      | hypothetical protein_group_133_  |
|  |  | dTDP-fucosamine acetyltransferase_wecD_2_                                | hypothetical protein_group_2141_ |
|  |  | Tyrosine recombinase XerC_xerC_2_                                        |                                  |
|  |  | Undecaprenyl-phosphate 4-deoxy-4-formamido-L-arabinose transferase_yfdH_ | _                                |
|  |  | Putative NAD(P)H nitroreductase_yfkO_                                    |                                  |
|  |  | putative ABC transporter ATP-binding protein YknY_yknY_2_                |                                  |
|  |  | Putative carboxypeptidase YodJ_yodJ_2_                                   |                                  |
|  |  | ABC transporter permease YtrF_ytrF_2_                                    |                                  |

\*Restriction-modification genes are bolded.

\*\*CRISPR-Cas9 genes are bolded.

**Table 7.** Summary of restriction-modification and orphan methyltransferase systems of Saccharibacteria isolates.

| Strain | Type | System | Predicted Recognition Sequence* | MTases active in the genome | Genes     | Name           | Coordinates     |
|--------|------|--------|---------------------------------|-----------------------------|-----------|----------------|-----------------|
| TM7x   | I    | R-M    | TTANNNNNNTARC                   | Active                      | S         | S1.SorTM7II    | 327806-328825   |
|        |      |        |                                 |                             | S         | S2.SorTMIIIP   | 329836-330966c  |
|        | I    | R-M    | CAAYNNNNRTC                     | Active                      | R         | SorTM7IP       | 655481-658615c  |
|        |      |        |                                 |                             | M         | M.SorTM7I      | 661559-662668c  |
|        |      |        |                                 | S                           | S.SorTM7I | 664329-665816c |                 |
| BB001  | III  | R-M    | AAATC                           | Active                      | R         | SspTM7IP       | 262014-264926c  |
|        |      |        |                                 |                             | M         | M.SspTM7I      | 265685-267694c  |
| AC001  | II   | R-M    | Unknown                         | Unknown                     | R         | SstACORFBP     | 183419-185092 c |
|        |      |        |                                 |                             | M         | M.SstACORFBP   | 185089-186144 c |
|        | III  | R-M    | CGCAT                           | Active                      | R         | SstACIP        | 354085-356841 c |
|        |      |        |                                 |                             | M         | M.SstACI       | 360026-361870 c |

\*Bolded nucleotides are putative methylation sites by PacBio sequencing analysis

**Table 8.** PM004 CRISPR RNA array

| Number of spacers/repeat | Position | Repeat Sequence                     | Spacer Sequence                |
|--------------------------|----------|-------------------------------------|--------------------------------|
| 1                        | 2065     | ATTATACCAATATCTAAATTGTCAGGGAACATAAC | TTTATTGACGTATGGTGGGTCATTGGTTAA |
| 2                        | 1999     | .....                               | ATGTAATACCTGCTTCCTTTCTACAAAAT  |
| 3                        | 1933     | .....                               | TGTCGGCTACGCTTACTCCATAAGAGTAAA |
| 4                        | 1867     | .....                               | TTTGAAAAGGTCTATGAGGTGCGCGGAGAT |
| 5                        | 1801     | .....                               | TCAGTTAGTTTGCTCAACTGTTCTTCAACT |
| 6                        | 1735     | .....                               | TTTTAAACAGTCAATGGTTTTATACGTTTG |
| 7                        | 1669     | .....                               | GAGATAAATACAGACTGCATCGTTTCCTCT |
| 8                        | 1603     | .....                               | TTTGCCCGTGAACAAAACCATTCCGATAGG |
| 9                        | 1537     | .....                               | CCCACAACCTTGATATCACGCTTCAGCCGT |
| 10                       | 1471     | .....                               | GCTCGATCAAGCAGGTGGCTCTATCTAAGG |
| 11                       | 1405     | .....                               | CAAGCACCGATCGTTGACCGCGACGGTGAT |
| 12                       | 1339     | .....                               | GAGATAAATACAGACTGCATCGTTTCCTCT |
| 13                       | 1273     | .....                               | TTTGCCCGTGAACAAAACCATTCCGATAGG |
| 14                       | 1207     | .....                               | CCCACAACCTTGATATCACGCTTCAGCCGT |
| 15                       | 1141     | .....                               | GCTCGATCAAGCAGGTGGCTCTATCTAAGG |
| 16                       | 1075     | .....                               | CAAGCACCGATCGTTGACCGCGACGGTGAT |
| 17                       | 1009     | .....                               | TCTGTTCAACTGGTAACACCAACGCACCTT |
| 18                       | 943      | .....                               | ATCGCAATCTATTGGGTCGTACGATTTTAA |
| 19                       | 877      | .....                               | GTCAAATATGTCGAAAATAAAGTATATTT  |
| 20                       | 811      | .....                               | CCACATTTCTTACACAGCTCTTAGCTTTA  |
| 21                       | 745      | .....                               | ACTAGCCAATTGCACGAGAAGGACGAGTAT |
| 22                       | 679      | .....                               | TAGTTTTCTTCAGTAGTTAAATTCTCTAA  |
| 23                       | 613      | .....                               | ACTAGCCAATTGCACGAGAAGGACGAGTAT |
| 24                       | 547      | .....                               | TAGTTTTCTTCAGTAGTTAAATTCTCTAA  |
| 25                       | 481      | ATTATACCAATATCTAAATTGTCAGGGAACATAAC |                                |

**Table 9.** Calculated generation/doubling time for each bulk assay measurement/replicate shown in minutes.

| Cells types/Replicates | 1        | 2         | 3         | 4        | 5        | Average     | Std deviation |
|------------------------|----------|-----------|-----------|----------|----------|-------------|---------------|
| XH001                  | 138.583  | 120.15    | 102.7224  |          |          | 120.4851333 | 17.93264882   |
| XH001+ TM7x            | 144.76   | 159.06176 | 157.07557 |          |          | 153.6324433 | 7.747672277   |
| F0337                  | 110.5257 | 136.0748  | 121.3825  | 113.3766 | 132.3474 | 122.7414    | 11.27856602   |
| F0337+BB001            | 143.2952 | 134.4476  | 129.6742  | 140.9998 | 142.1557 | 138.1145    | 5.834824884   |

## APPENDIX REFERENCES

- Bor B, Poweleit N, Bois JS, Cen L, Bedree JK, Zhou ZH, Gunsalus RP, Lux R, McLean JS, He XS et al. 2016. Phenotypic and physiological characterization of the epibiotic interaction between tm7x and its basibiont actinomyces. *Microbial Ecology*. 71(1):243-255.
- Brinig MM, Lepp PW, Ouverney CC, Armitage GC, Relman DA. 2003. Prevalence of bacteria of division tm7 in human subgingival plaque and their association with disease. *Applied and Environmental Microbiology*. 69(3):1687-1694.
- Bushnell B. 2015. BBDuk: Adapter/quality trimming and filtering, Software, <https://www.Geneious.Com/plugins/bbdduk/>
- Darling AC, Mau B, Blattner FR, Perna NT. 2004. Mauve: Multiple alignment of conserved genomic sequence with rearrangements. *Genome Res*. 14(7):1394-1403.
- Heberle H, Meirelles GV, da Silva FR, Telles GP, Minghim R. 2015. Interactivenn: A web-based tool for the analysis of sets through venn diagrams. *BMC Bioinformatics*. 16:169.
- Hugenholtz P, Tyson GW, Webb RI, Wagner AM, Blackall LL. 2001. Investigation of candidate division tm7, a recently recognized major lineage of the domain bacteria with no known pure-culture representatives. *Appl Environ Microbiol*. 67(1):411-419.
- Hutchison CA, 3rd, Chuang RY, Noskov VN, Assad-Garcia N, Deerinck TJ, Ellisman MH, Gill J, Kannan K, Karas BJ, Ma L et al. 2016. Design and synthesis of a minimal bacterial genome. *Science*. 351(6280):aad6253.
- Kanehisa M, Sato Y, Morishima K. 2016. Blastkoala and ghostkoala: Kegg tools for functional characterization of genome and metagenome sequences. *J Mol Biol*. 428(4):726-731.
- Page AJ, Cummins CA, Hunt M, Wong VK, Reuter S, Holden MT, Fookes M, Falush D, Keane JA, Parkhill J. 2015. Roary: Rapid large-scale prokaryote pan genome analysis. *Bioinformatics*. 31(22):3691-3693.
